# Supplementary material for: Density functional calculations reveal a flexible version of the copper paddlewheel unit: implications for metal organic frameworks
Source: Royal Society of Chemistry journal article supplement (doi:10.1039/c6dt01474g), 2016-01-01
Supplement: c6dt01474g1.pdf [file c6dt01474g1.pdf]

# Density Functional Calculations Reveal a Flexible Version of the Copper Paddlewheel Unit: Implications for Metal Organic Frameworks

K. A. H. Alzahrana and R. J. Deeth<sup>†</sup>

Department of Chemistry, University of Warwick, Coventry CV4 7AL, UK.

<sup>†</sup> Current address: School of Chemistry, University of Edinburgh, Edinburgh, EH9 3FJ, UK

## Electronic Supporting Information

### Computational details

Most calculations used ORCA version 3.0.3.<sup>1</sup> A typical geometry optimisation/frequency calculation employed the Becke-Perdew functional, def2-SVP basis sets, a COSMO solvation field with water as the solvent and, for the NHC systems, the Grimme D3 dispersion corrections. For copper species, a spin-unrestricted formalism was employed with a total spin  $S = 1$ .

```
UKS BP RI def2-SVP def2-SVP/J Grid6 NoFinalGrid TightSCF SlowConv Cosmo(water) NumFreq  
!KDIIS  
!D3BJ
```

Magnetic coupling constants employed the broken-symmetry (BS) scheme implemented in ORCA (FlipSpin) and used the B3LYP functional with def2-TZVP basis sets and the COSMO(water) solvation field. BS geometry optimisations included Grimme's D3 correction.

The structural studies were based on the spin triplet potential energy surface rather than the BS surface for two reasons.

Firstly, we found no significant geometry change between the structure optimised on the (ferromagnetic) triplet state and the BS solution. The effect on the magnetic coupling was noticeable but does not change our conclusions. For the symmetric TBP NHC system,  $[\text{Cu}_2(\text{acetate})_4(\text{Me}_2\text{NHC})_2]$ , the computed  $J$  value for the  $S = 1$  geometry is  $-139.55 \text{ cm}^{-1}$  and for the BS geometry,  $J = -166.35 \text{ cm}^{-1}$ .

Secondly, while geometry optimisations were possible on the BS surface, numerical frequency calculations (necessary since we were using a COSMO field) were unstable. We thus opted to use the triplet surface throughout.

The high-symmetry (constrained) optimisations used the Amsterdam Density Functional (ADF) 2014 code<sup>2-4</sup> since, in our hands, we find it more convenient than ORCA when specifying particular electronic configurations. Geometry optimisations employed the Becke-Perdew functional with DZP basis sets on all atoms apart from the metals for which TZP bases were employed. Small frozen cores were selected and a COSMO(water) correction, as implemented in ADF, was used. Given the qualitative nature of the high-symmetry study, we did not bother with any dispersion corrections nor were vibrational frequencies computed.

1. F. Neese, U. Becker, D. Ganiouchine, S. Koßmann, T. Petrenko, C. Riplinger and F. Wennmohs, Max Planck Institute for Chemical Energy Conversion, Muellheim, ORCA 3.0.1 edn., 2014.
2. G. T. te Velde, F. M. Bickelhaupt, E. J. Baerends, C. F. Guerra, S. J. A. Van Gisbergen, J. G. Snijders and T. Ziegler, *J. Comput. Chem.*, 2001, 22, 931-967.
3. C. Fonseca Guerra, J. G. Snijders, G. te Velde and E. J. Baerends, *Theor. Chem. Acc.*, 1998, 99, 391.
4. E. J. Baerends, T. Ziegler, J. Autschbach, D. Bashford, A. Bérces, F. M. Bickelhaupt, C. Bo, P. M. Boerrigter, L. Cavallo, D. P. Chong, L. Deng, R. M. Dickson, D. E. Ellis, M. van Faassen, L. Fan, T. H. Fischer, C. Fonseca Guerra, A. Ghysels, A. Giammona, S. J. A. van Gisbergen, A. W. Götz, J. A. Groeneveld, O. V. Gritsenko, M. Grüning, S. Gusarov, F. E. Harris, P. van den Hoek, C. R. Jacob, H. Jacobsen, L. Jensen, J. W. Kaminski, G. van Kessel, F. Kootstra, A. Kovalenko, M. V. Krykunov, E. van Lenthe, D. A. McCormack, A. Michalak, M. Mitoraj, J. Neugebauer, V. P. Nicu, L. Noodleman, V. P. Osinga, S. Patchkovskii, P. H. T. Philipsen, D. Post, C. C. Pye, W. Ravenek, J. I. Rodríguez, P. Ros, P. R. T. Schipper, G. Schreckenbach, J. S. Seldenthuis, M. Seth, J. G. Snijders, M. Solà, M. Swart, D. Swerhone, G. te Velde, P. Vernooijs, L. Versluis, L. Visscher, O. Visser, F. Wang, T. A. Wesolowski, E. M. van Wezenbeek, G. Wiesenekker, S. K. Wolff, T. K. Woo and A. L. Yakovlev, SCM, Theoretical Chemistry, Vrije Universiteit, Amsterdam, Netherlands, 2014.
5. A. M. Magill, K. J. Cavell and B. F. Yates, *J. Am. Chem. Soc.*, 2004, 126, 8717-8724.
6. K. D. Vogiatzis, W. Klopper, A. Mavrandonakis and K. Fink, *Chemphyschem*, 2011, 12, 3307-3319.

## Cartesian coordinates, energies and lowest 12 vibrational frequencies to confirm local minimum achieved (where computed)

Complexes are listed in the order in which they appear in the manuscript. Nomenclature:

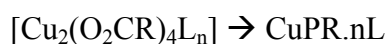

The electronic energy is included in parentheses after the name of the appropriate computer code and is a total electronic energy for ORCA and a binding energy for ADF.

The necessary MO occupations to generate the desired energy state in ADF are included. If no occupation specified, that geometry corresponds to the automatically located Aufbau state.

### **CuPH.2NH3: 'elongated': ORCA (-4150.49254046 Eh)**

|    |              |              |              |
|----|--------------|--------------|--------------|
| Cu | -0.005099000 | 0.000448000  | 1.333207000  |
| O  | 1.428995000  | -1.432605000 | 1.143311000  |
| O  | -1.437377000 | 1.433604000  | 1.136557000  |
| O  | -1.437409000 | -1.432899000 | 1.136845000  |
| O  | 1.428860000  | 1.433661000  | 1.142840000  |
| C  | 1.824657000  | -1.824503000 | 0.005025000  |
| C  | -1.824692000 | -1.824725000 | -0.004415000 |
| Cu | 0.004855000  | -0.000205000 | -1.333202000 |
| O  | -1.429092000 | 1.432959000  | -1.143223000 |
| O  | 1.437207000  | -1.433393000 | -1.136411000 |

|   |              |              |              |
|---|--------------|--------------|--------------|
| O | 1.437112000  | 1.433051000  | -1.136973000 |
| O | -1.429218000 | -1.433338000 | -1.142925000 |
| C | -1.824659000 | 1.824857000  | -0.004894000 |
| C | 1.824302000  | 1.824970000  | 0.004288000  |
| H | -2.618582000 | -2.618218000 | -0.007027000 |
| H | -2.618060000 | 2.618827000  | -0.007916000 |
| H | 2.617823000  | 2.618832000  | 0.006838000  |
| H | 2.618221000  | -2.618302000 | 0.008049000  |
| N | -0.002564000 | -0.001223000 | -3.511452000 |
| H | 0.938875000  | -0.027108000 | -3.928611000 |
| H | -0.502895000 | -0.808032000 | -3.911396000 |
| H | -0.458704000 | 0.830474000  | -3.913239000 |
| N | 0.002372000  | 0.000300000  | 3.511455000  |
| H | -0.939083000 | -0.024187000 | 3.928665000  |
| H | 0.501719000  | -0.806913000 | 3.911813000  |
| H | 0.459563000  | 0.831647000  | 3.912774000  |

|     |       |                    |
|-----|-------|--------------------|
| 0:  | 0.00  | cm** <sup>-1</sup> |
| 1:  | 0.00  | cm** <sup>-1</sup> |
| 2:  | 0.00  | cm** <sup>-1</sup> |
| 3:  | 0.00  | cm** <sup>-1</sup> |
| 4:  | 0.00  | cm** <sup>-1</sup> |
| 5:  | 0.00  | cm** <sup>-1</sup> |
| 6:  | 33.46 | cm** <sup>-1</sup> |
| 7:  | 49.39 | cm** <sup>-1</sup> |
| 8:  | 60.80 | cm** <sup>-1</sup> |
| 9:  | 70.58 | cm** <sup>-1</sup> |
| 10: | 77.27 | cm** <sup>-1</sup> |
| 11: | 84.80 | cm** <sup>-1</sup> |
| 12: | 89.56 | cm** <sup>-1</sup> |

**CuPH.2NH3: 'mixed': ORCA (-4150.48497904 Eh)**

|    |              |              |              |
|----|--------------|--------------|--------------|
| Cu | -0.007629000 | 0.000505000  | 1.263830000  |
| O  | 1.461325000  | -1.468174000 | 1.142750000  |
| O  | -1.475998000 | 1.469546000  | 1.133177000  |
| O  | -1.476126000 | -1.468539000 | 1.133442000  |
| O  | 1.461353000  | 1.469495000  | 1.142442000  |
| C  | 1.860290000  | -1.860146000 | 0.007301000  |
| C  | -1.860515000 | -1.860372000 | -0.006812000 |
| Cu | 0.007343000  | 0.000023000  | -1.263803000 |
| O  | -1.461288000 | 1.469057000  | -1.142753000 |
| O  | 1.475966000  | -1.468734000 | -1.133089000 |
| O  | 1.475721000  | 1.469116000  | -1.133488000 |
| O  | -1.461724000 | -1.468736000 | -1.142414000 |
| C  | -1.860043000 | 1.861135000  | -0.007265000 |
| C  | 1.859961000  | 1.861134000  | 0.006765000  |
| H  | -2.654933000 | -2.655089000 | -0.011970000 |
| H  | -2.654208000 | 2.656105000  | -0.012771000 |
| H  | 2.654160000  | 2.656071000  | 0.011823000  |
| H  | 2.654830000  | -2.654735000 | 0.012791000  |
| N  | -0.004030000 | -0.001473000 | -3.332069000 |
| H  | 0.944262000  | -0.029843000 | -3.731978000 |
| H  | -0.514195000 | -0.815776000 | -3.702314000 |
| H  | -0.466483000 | 0.839236000  | -3.705886000 |
| N  | 0.003768000  | -0.000090000 | 3.332077000  |
| H  | -0.944544000 | -0.027217000 | 3.732024000  |
| H  | 0.513070000  | -0.814727000 | 3.702768000  |
| H  | 0.467130000  | 0.840337000  | 3.705406000  |

|     |       |                    |
|-----|-------|--------------------|
| 0:  | 0.00  | cm** <sup>-1</sup> |
| 1:  | 0.00  | cm** <sup>-1</sup> |
| 2:  | 0.00  | cm** <sup>-1</sup> |
| 3:  | 0.00  | cm** <sup>-1</sup> |
| 4:  | 0.00  | cm** <sup>-1</sup> |
| 5:  | 0.00  | cm** <sup>-1</sup> |
| 6:  | 8.79  | cm** <sup>-1</sup> |
| 7:  | 12.51 | cm** <sup>-1</sup> |
| 8:  | 84.42 | cm** <sup>-1</sup> |
| 9:  | 86.70 | cm** <sup>-1</sup> |
| 10: | 87.12 | cm** <sup>-1</sup> |
| 11: | 89.28 | cm** <sup>-1</sup> |
| 12: | 91.19 | cm** <sup>-1</sup> |

**CuPH.2H2O: T<sub>0</sub>(D<sub>2h</sub>): ADF (-5.10539471 a.u.)**

|    |              |              |              |
|----|--------------|--------------|--------------|
| Cu | 0.000000000  | 0.000000000  | -1.275396000 |
| Cu | 0.000000000  | 0.000000000  | 1.275396000  |
| O  | 1.426069000  | 1.421853000  | -1.140404000 |
| O  | 1.426069000  | -1.421853000 | -1.140404000 |
| O  | -1.426069000 | 1.421853000  | -1.140404000 |
| O  | -1.426069000 | -1.421853000 | -1.140404000 |
| C  | 1.821355000  | 1.815160000  | 0.000000000  |
| C  | 1.821355000  | -1.815160000 | 0.000000000  |
| O  | 1.426069000  | 1.421853000  | 1.140404000  |
| O  | -1.426069000 | -1.421853000 | 1.140404000  |
| C  | -1.821355000 | -1.815160000 | 0.000000000  |
| O  | 1.426069000  | -1.421853000 | 1.140404000  |
| O  | -1.426069000 | 1.421853000  | 1.140404000  |
| C  | -1.821355000 | 1.815160000  | 0.000000000  |
| O  | 0.000000000  | 0.000000000  | -3.548713000 |
| H  | 0.783560000  | 0.000000000  | -4.141379000 |
| H  | -0.783560000 | 0.000000000  | -4.141379000 |
| O  | 0.000000000  | 0.000000000  | 3.548713000  |
| H  | 0.783560000  | 0.000000000  | 4.141379000  |
| H  | -0.783560000 | 0.000000000  | 4.141379000  |
| H  | -2.602677000 | 2.595139000  | 0.000000000  |
| H  | -2.602677000 | -2.595139000 | 0.000000000  |
| H  | 2.602677000  | -2.595139000 | 0.000000000  |
| H  | 2.602677000  | 2.595139000  | 0.000000000  |

**CuPH.2H2O: T<sub>M</sub>(D<sub>2h</sub>): ADF (-5.07922654 a.u.)**

|    |              |              |              |
|----|--------------|--------------|--------------|
| Cu | 0.000000000  | 0.000000000  | -1.227489000 |
| Cu | 0.000000000  | 0.000000000  | 1.227489000  |
| O  | 1.467907000  | 1.463810000  | -1.136654000 |
| O  | 1.467907000  | -1.463810000 | -1.136654000 |
| O  | -1.467907000 | 1.463810000  | -1.136654000 |
| O  | -1.467907000 | -1.463810000 | -1.136654000 |
| C  | 1.863957000  | 1.859658000  | 0.000000000  |
| C  | 1.863957000  | -1.859658000 | 0.000000000  |
| O  | 1.467907000  | 1.463810000  | 1.136654000  |
| O  | -1.467907000 | -1.463810000 | 1.136654000  |
| C  | -1.863957000 | -1.859658000 | 0.000000000  |
| O  | 1.467907000  | -1.463810000 | 1.136654000  |
| O  | -1.467907000 | 1.463810000  | 1.136654000  |
| C  | -1.863957000 | 1.859658000  | 0.000000000  |
| O  | 0.000000000  | 0.000000000  | -3.316186000 |
| H  | 0.793920000  | 0.000000000  | -3.894232000 |
| H  | -0.793920000 | 0.000000000  | -3.894232000 |
| O  | 0.000000000  | 0.000000000  | 3.316186000  |
| H  | 0.793920000  | 0.000000000  | 3.894232000  |

|   |              |              |             |
|---|--------------|--------------|-------------|
| H | -0.793920000 | 0.000000000  | 3.894232000 |
| H | -2.644802000 | 2.641828000  | 0.000000000 |
| H | -2.644802000 | -2.641828000 | 0.000000000 |
| H | 2.644802000  | -2.641828000 | 0.000000000 |
| H | 2.644802000  | 2.641828000  | 0.000000000 |

**CuPCH3.2H2O: T<sub>0</sub>(D<sub>2</sub>): ADF (-7.51870373 a.u.)**

|    |              |              |              |
|----|--------------|--------------|--------------|
| Cu | 0.000000000  | 0.000000000  | 1.260700000  |
| Cu | 0.000000000  | 0.000000000  | -1.260700000 |
| O  | 1.421500000  | -1.427700000 | 1.114200000  |
| O  | 1.427400000  | 1.411100000  | 1.158400000  |
| O  | -1.427400000 | -1.411100000 | 1.158400000  |
| O  | -1.421500000 | 1.427700000  | 1.114200000  |
| C  | 1.837100000  | -1.829800000 | -0.023600000 |
| C  | 1.837100000  | 1.829800000  | 0.023600000  |
| O  | 1.427400000  | -1.411100000 | -1.158400000 |
| O  | -1.427400000 | 1.411100000  | -1.158400000 |
| C  | -1.837100000 | 1.829800000  | -0.023600000 |
| O  | 1.421500000  | 1.427700000  | -1.114200000 |
| O  | -1.421500000 | -1.427700000 | -1.114200000 |
| C  | -1.837100000 | -1.829800000 | 0.023600000  |
| O  | 0.000000000  | 0.000000000  | 3.566200000  |
| H  | 0.780500000  | 0.051300000  | 4.160500000  |
| H  | -0.780500000 | -0.051300000 | 4.160500000  |
| O  | 0.000000000  | 0.000000000  | -3.566200000 |
| H  | 0.780500000  | -0.051300000 | -4.160500000 |
| H  | -0.780500000 | 0.051300000  | -4.160500000 |
| C  | -2.905900000 | 2.893200000  | -0.019000000 |
| H  | -2.528700000 | 3.782700000  | 0.504900000  |
| H  | -3.199200000 | 3.161700000  | -1.039700000 |
| H  | -3.781300000 | 2.525900000  | 0.534900000  |
| C  | 2.905900000  | 2.893200000  | 0.019000000  |
| H  | 2.528700000  | 3.782700000  | -0.504900000 |
| H  | 3.199200000  | 3.161700000  | 1.039700000  |
| H  | 3.781300000  | 2.525900000  | -0.534900000 |
| C  | 2.905900000  | -2.893200000 | -0.019000000 |
| H  | 3.199200000  | -3.161700000 | -1.039700000 |
| H  | 3.781300000  | -2.525900000 | 0.534900000  |
| H  | 2.528700000  | -3.782700000 | 0.504900000  |
| C  | -2.905900000 | -2.893200000 | 0.019000000  |
| H  | -3.199200000 | -3.161700000 | 1.039700000  |
| H  | -3.781300000 | -2.525900000 | -0.534900000 |
| H  | -2.528700000 | -3.782700000 | -0.504900000 |

**CuPCH3.2H2O: T<sub>M</sub>(D<sub>2</sub>): ADF (-7.48941290 a.u.)**

|    |              |              |              |
|----|--------------|--------------|--------------|
| Cu | 0.000000000  | 0.000000000  | -1.215677000 |
| Cu | 0.000000000  | 0.000000000  | 1.215677000  |
| O  | -1.481625000 | 1.457362000  | -1.089093000 |
| O  | 1.434060000  | 1.479642000  | -1.174149000 |
| O  | -1.434060000 | -1.479642000 | -1.174149000 |
| O  | 1.481625000  | -1.457362000 | -1.089093000 |
| C  | -1.870641000 | 1.883397000  | 0.046860000  |
| C  | 1.870641000  | 1.883397000  | -0.046860000 |
| O  | -1.434060000 | 1.479642000  | 1.174149000  |
| O  | 1.434060000  | -1.479642000 | 1.174149000  |
| C  | 1.870641000  | -1.883397000 | 0.046860000  |
| O  | 1.481625000  | 1.457362000  | 1.089093000  |
| O  | -1.481625000 | -1.457362000 | 1.089093000  |
| C  | -1.870641000 | -1.883397000 | -0.046860000 |
| O  | 0.000000000  | 0.000000000  | -3.323139000 |
| H  | 0.258406000  | 0.749214000  | -3.902544000 |

|   |              |              |              |
|---|--------------|--------------|--------------|
| H | -0.258406000 | -0.749214000 | -3.902544000 |
| O | 0.000000000  | 0.000000000  | 3.323139000  |
| H | -0.258406000 | 0.749214000  | 3.902544000  |
| H | 0.258406000  | -0.749214000 | 3.902544000  |
| C | 2.937418000  | -2.953322000 | 0.048672000  |
| H | 3.828996000  | -2.577179000 | -0.472533000 |
| H | 3.203094000  | -3.246280000 | 1.070325000  |
| H | 2.572242000  | -3.829425000 | -0.505396000 |
| C | 2.937418000  | 2.953322000  | -0.048672000 |
| H | 3.828996000  | 2.577179000  | 0.472533000  |
| H | 3.203094000  | 3.246280000  | -1.070325000 |
| H | 2.572242000  | 3.829425000  | 0.505396000  |
| C | -2.937418000 | 2.953322000  | 0.048672000  |
| H | -3.203094000 | 3.246280000  | 1.070325000  |
| H | -2.572242000 | 3.829425000  | -0.505396000 |
| H | -3.828996000 | 2.577179000  | -0.472533000 |
| C | -2.937418000 | -2.953322000 | -0.048672000 |
| H | -3.203094000 | -3.246280000 | -1.070325000 |
| H | -2.572242000 | -3.829425000 | 0.505396000  |
| H | -3.828996000 | -2.577179000 | 0.472533000  |

**CuPCH3.2NH3: T<sub>0</sub>(C<sub>2h</sub>): ADF (-7.92078556 a.u.)**

|    |              |              |              |
|----|--------------|--------------|--------------|
| Cu | -1.299400000 | 0.000900000  | 0.000000000  |
| O  | -1.135100000 | 1.426500000  | 1.431000000  |
| O  | -1.137000000 | -1.433100000 | -1.427000000 |
| O  | -1.137000000 | -1.433100000 | 1.427000000  |
| O  | -1.135100000 | 1.426500000  | -1.431000000 |
| C  | 0.000600000  | 1.843200000  | 1.835500000  |
| C  | -0.000600000 | -1.843200000 | 1.835500000  |
| Cu | 1.299400000  | -0.000900000 | 0.000000000  |
| O  | 1.135100000  | -1.426500000 | -1.431000000 |
| O  | 1.137000000  | 1.433100000  | 1.427000000  |
| O  | 1.137000000  | 1.433100000  | -1.427000000 |
| O  | 1.135100000  | -1.426500000 | 1.431000000  |
| C  | -0.000600000 | -1.843200000 | -1.835500000 |
| C  | 0.000600000  | 1.843200000  | -1.835500000 |
| C  | -0.002900000 | 2.944000000  | 2.869200000  |
| H  | 0.911300000  | 2.913900000  | 3.473900000  |
| H  | -0.039200000 | 3.911700000  | 2.345400000  |
| H  | -0.889200000 | 2.870100000  | 3.511000000  |
| C  | 0.002900000  | -2.944000000 | 2.869200000  |
| H  | 0.889200000  | -2.870100000 | 3.511000000  |
| H  | -0.911300000 | -2.913900000 | 3.473900000  |
| H  | 0.039200000  | -3.911700000 | 2.345400000  |
| C  | 0.002900000  | -2.944000000 | -2.869200000 |
| H  | -0.911300000 | -2.913900000 | -3.473900000 |
| H  | 0.889200000  | -2.870100000 | -3.511000000 |
| H  | 0.039200000  | -3.911700000 | -2.345400000 |
| C  | -0.002900000 | 2.944000000  | -2.869200000 |
| H  | -0.889200000 | 2.870100000  | -3.511000000 |
| H  | -0.039200000 | 3.911700000  | -2.345400000 |
| H  | 0.911300000  | 2.913900000  | -3.473900000 |
| N  | 3.530100000  | -0.007200000 | 0.000000000  |
| H  | 3.932400000  | 0.937700000  | 0.000000000  |
| H  | 3.917600000  | -0.486600000 | 0.821600000  |
| H  | 3.917600000  | -0.486600000 | -0.821600000 |
| N  | -3.530100000 | 0.007200000  | 0.000000000  |
| H  | -3.917600000 | 0.486600000  | -0.821600000 |
| H  | -3.932400000 | -0.937700000 | 0.000000000  |
| H  | -3.917600000 | 0.486600000  | 0.821600000  |

**CuPCH3.2NH3: T<sub>M</sub>(C<sub>2h</sub>): ADF (-7.91005747 a.u.)**

**symmetry C (2h)**

**occupations**

**A.g 21.0 // 21.0**

**B.g 16.0 // 15.0**

**A.u 16.0 // 16.0**

**B.u 21.0 // 20.0**

**end**

|    |              |              |              |
|----|--------------|--------------|--------------|
| Cu | -1.249700000 | -0.001100000 | 0.000000000  |
| O  | -1.141500000 | 1.472100000  | 1.469300000  |
| O  | -1.126300000 | -1.469100000 | -1.473200000 |
| O  | -1.126300000 | -1.469100000 | 1.473200000  |
| O  | -1.141500000 | 1.472100000  | -1.469300000 |
| C  | -0.007700000 | 1.881300000  | 1.880700000  |
| C  | 0.007700000  | -1.881300000 | 1.880700000  |
| Cu | 1.249700000  | 0.001100000  | 0.000000000  |
| O  | 1.141500000  | -1.472100000 | -1.469300000 |
| O  | 1.126300000  | 1.469100000  | 1.473200000  |
| O  | 1.126300000  | 1.469100000  | -1.473200000 |
| O  | 1.141500000  | -1.472100000 | 1.469300000  |
| C  | 0.007700000  | -1.881300000 | -1.880700000 |
| C  | -0.007700000 | 1.881300000  | -1.880700000 |
| C  | -0.006000000 | 2.977000000  | 2.926300000  |
| H  | 0.876800000  | 2.895700000  | 3.572000000  |
| H  | 0.035500000  | 3.947800000  | 2.409000000  |
| H  | -0.922600000 | 2.945500000  | 3.527300000  |
| C  | 0.006000000  | -2.977000000 | 2.926300000  |
| H  | 0.922600000  | -2.945500000 | 3.527300000  |
| H  | -0.876800000 | -2.895700000 | 3.572000000  |
| H  | -0.035500000 | -3.947800000 | 2.409000000  |
| C  | 0.006000000  | -2.977000000 | -2.926300000 |
| H  | -0.876800000 | -2.895700000 | -3.572000000 |
| H  | 0.922600000  | -2.945500000 | -3.527300000 |
| H  | -0.035500000 | -3.947800000 | -2.409000000 |
| C  | -0.006000000 | 2.977000000  | -2.926300000 |
| H  | -0.922600000 | 2.945500000  | -3.527300000 |
| H  | 0.035500000  | 3.947800000  | -2.409000000 |
| H  | 0.876800000  | 2.895700000  | -3.572000000 |
| N  | 3.328300000  | -0.020800000 | 0.000000000  |
| H  | 3.728200000  | 0.925200000  | 0.000000000  |
| H  | 3.692200000  | -0.508800000 | 0.827600000  |
| H  | 3.692200000  | -0.508800000 | -0.827600000 |
| N  | -3.328300000 | 0.020800000  | 0.000000000  |
| H  | -3.692200000 | 0.508800000  | -0.827600000 |
| H  | -3.728200000 | -0.925200000 | 0.000000000  |
| H  | -3.692200000 | 0.508800000  | 0.827600000  |

**CuPCH3.2py: T<sub>0</sub>(D<sub>2</sub>): ADF (-11.62463259 a.u.)**

|    |              |              |              |
|----|--------------|--------------|--------------|
| Cu | 1.290700000  | 0.000000000  | 0.000000000  |
| Cu | -1.290700000 | 0.000000000  | 0.000000000  |
| O  | 1.121000000  | -1.438200000 | -1.428600000 |
| O  | 1.152000000  | 1.403400000  | -1.446600000 |
| O  | 1.152000000  | -1.403400000 | 1.446600000  |
| O  | 1.121000000  | 1.438200000  | 1.428600000  |
| C  | -0.018000000 | -1.819100000 | -1.856900000 |
| C  | 0.018000000  | 1.819100000  | -1.856900000 |
| O  | -1.152000000 | -1.403400000 | -1.446600000 |
| O  | -1.152000000 | 1.403400000  | 1.446600000  |

|   |              |              |              |
|---|--------------|--------------|--------------|
| C | -0.018000000 | 1.819100000  | 1.856900000  |
| O | -1.121000000 | 1.438200000  | -1.428600000 |
| O | -1.121000000 | -1.438200000 | 1.428600000  |
| C | 0.018000000  | -1.819100000 | 1.856900000  |
| C | -0.016000000 | 2.861300000  | 2.950700000  |
| H | 0.495500000  | 3.765600000  | 2.591600000  |
| H | -1.036400000 | 3.113500000  | 3.259800000  |
| H | 0.549500000  | 2.481200000  | 3.813400000  |
| C | 0.016000000  | 2.861300000  | -2.950700000 |
| H | -0.495500000 | 3.765600000  | -2.591600000 |
| H | 1.036400000  | 3.113500000  | -3.259800000 |
| H | -0.549500000 | 2.481200000  | -3.813400000 |
| C | -0.016000000 | -2.861300000 | -2.950700000 |
| H | -1.036400000 | -3.113500000 | -3.259800000 |
| H | 0.549500000  | -2.481200000 | -3.813400000 |
| H | 0.495500000  | -3.765600000 | -2.591600000 |
| C | 0.016000000  | -2.861300000 | 2.950700000  |
| H | 1.036400000  | -3.113500000 | 3.259800000  |
| H | -0.549500000 | -2.481200000 | 3.813400000  |
| H | -0.495500000 | -3.765600000 | 2.591600000  |
| N | 3.518700000  | 0.000000000  | 0.000000000  |
| C | 4.209800000  | -0.143700000 | 1.146200000  |
| C | 4.209800000  | 0.143700000  | -1.146200000 |
| C | 5.602000000  | -0.151200000 | 1.190800000  |
| C | 5.602000000  | 0.151200000  | -1.190800000 |
| C | 6.312200000  | 0.000000000  | 0.000000000  |
| H | 3.615200000  | -0.261600000 | 2.053600000  |
| H | 3.615200000  | 0.261600000  | -2.053600000 |
| H | 6.116200000  | -0.273400000 | 2.145100000  |
| H | 6.116200000  | 0.273400000  | -2.145100000 |
| H | 7.403700000  | 0.000000000  | 0.000000000  |
| N | -3.518700000 | 0.000000000  | 0.000000000  |
| C | -4.209800000 | -0.143700000 | -1.146200000 |
| C | -4.209800000 | 0.143700000  | 1.146200000  |
| C | -5.602000000 | -0.151200000 | -1.190800000 |
| C | -5.602000000 | 0.151200000  | 1.190800000  |
| C | -6.312200000 | 0.000000000  | 0.000000000  |
| H | -3.615200000 | -0.261600000 | -2.053600000 |
| H | -3.615200000 | 0.261600000  | 2.053600000  |
| H | -6.116200000 | -0.273400000 | -2.145100000 |
| H | -6.116200000 | 0.273400000  | 2.145100000  |
| H | -7.403700000 | 0.000000000  | 0.000000000  |

**CuPCH3.2py: T<sub>M</sub>(D<sub>2</sub>): ADF (-11.61336618 a.u.)**

**symmetry D(2)**

**occupations**

**A 24.0 1.0 // 24.0 1.0**

**B1 23.0 // 23.0**

**B2 23.0 // 23.0**

**B3 23.0 1.0 1.0 // 23.0 0.0 0.0**

**end**

|    |              |              |              |
|----|--------------|--------------|--------------|
| Cu | 1.244300000  | 0.000000000  | 0.000000000  |
| Cu | -1.244300000 | 0.000000000  | 0.000000000  |
| O  | 1.136100000  | -1.546600000 | -1.399300000 |
| O  | 1.121700000  | 1.387500000  | -1.537900000 |
| O  | 1.121700000  | -1.387500000 | 1.537900000  |
| O  | 1.136100000  | 1.546600000  | 1.399300000  |
| C  | 0.003800000  | -1.878500000 | -1.876600000 |
| C  | -0.003800000 | 1.878500000  | -1.876600000 |
| O  | -1.121700000 | -1.387500000 | -1.537900000 |



|   |              |              |              |
|---|--------------|--------------|--------------|
| O | -1.121700000 | 1.387500000  | 1.537900000  |
| C | 0.003800000  | 1.878500000  | 1.876600000  |
| O | -1.136100000 | 1.546600000  | -1.399300000 |
| O | -1.136100000 | -1.546600000 | 1.399300000  |
| C | -0.003800000 | -1.878500000 | 1.876600000  |
| C | 0.004800000  | 2.958200000  | 2.939400000  |
| H | 0.439000000  | 3.877100000  | 2.520000000  |
| H | -1.009200000 | 3.163200000  | 3.300000000  |
| H | 0.641600000  | 2.643900000  | 3.778300000  |
| C | -0.004800000 | 2.958200000  | -2.939400000 |
| H | -0.439000000 | 3.877100000  | -2.520000000 |
| H | 1.009200000  | 3.163200000  | -3.300000000 |
| H | -0.641600000 | 2.643900000  | -3.778300000 |
| C | 0.004800000  | -2.958200000 | -2.939400000 |
| H | -1.009200000 | -3.163200000 | -3.300000000 |
| H | 0.641600000  | -2.643900000 | -3.778300000 |
| H | 0.439000000  | -3.877100000 | -2.520000000 |
| C | -0.004800000 | -2.958200000 | 2.939400000  |
| H | 1.009200000  | -3.163200000 | 3.300000000  |
| H | -0.641600000 | -2.643900000 | 3.778300000  |
| H | -0.439000000 | -3.877100000 | 2.520000000  |
| N | 3.318500000  | 0.000000000  | 0.000000000  |
| C | 3.997000000  | -0.082100000 | 1.157900000  |
| C | 3.997000000  | 0.082100000  | -1.157900000 |
| C | 5.387800000  | -0.083100000 | 1.198000000  |
| C | 5.387800000  | 0.083100000  | -1.198000000 |
| C | 6.096000000  | 0.000000000  | 0.000000000  |
| H | 3.395700000  | -0.152600000 | 2.064600000  |
| H | 3.395700000  | 0.152600000  | -2.064600000 |
| H | 5.900600000  | -0.149500000 | 2.158000000  |
| H | 5.900600000  | 0.149500000  | -2.158000000 |
| H | 7.187300000  | 0.000000000  | 0.000000000  |
| N | -3.318500000 | 0.000000000  | 0.000000000  |
| C | -3.997000000 | -0.082100000 | -1.157900000 |
| C | -3.997000000 | 0.082100000  | 1.157900000  |
| C | -5.387800000 | -0.083100000 | -1.198000000 |
| C | -5.387800000 | 0.083100000  | 1.198000000  |
| C | -6.096000000 | 0.000000000  | 0.000000000  |
| H | -3.395700000 | -0.152600000 | -2.064600000 |
| H | -3.395700000 | 0.152600000  | 2.064600000  |
| H | -5.900600000 | -0.149500000 | -2.158000000 |
| H | -5.900600000 | 0.149500000  | 2.158000000  |
| H | -7.187300000 | 0.000000000  | 0.000000000  |

**CuPCH3.2CN: T<sub>0</sub>(D<sub>2</sub>): ADF (-7.95330195)**

|    |              |              |              |
|----|--------------|--------------|--------------|
| Cu | 0.000000000  | -1.369530000 | 0.000000000  |
| Cu | 0.000000000  | 1.369530000  | 0.000000000  |
| O  | -1.430383000 | -1.110928000 | 1.465270000  |
| O  | -1.460366000 | -1.162540000 | -1.419503000 |
| O  | 1.460366000  | -1.162540000 | 1.419503000  |
| O  | 1.430383000  | -1.110928000 | -1.465270000 |
| C  | -1.855029000 | 0.027527000  | 1.846892000  |
| C  | -1.855029000 | -0.027527000 | -1.846892000 |
| O  | -1.460366000 | 1.162540000  | 1.419503000  |
| O  | 1.460366000  | 1.162540000  | -1.419503000 |
| C  | 1.855029000  | 0.027527000  | -1.846892000 |
| O  | -1.430383000 | 1.110928000  | -1.465270000 |
| O  | 1.430383000  | 1.110928000  | 1.465270000  |
| C  | 1.855029000  | -0.027527000 | 1.846892000  |
| C  | 2.931186000  | 0.025695000  | -2.910668000 |

|   |              |              |              |
|---|--------------|--------------|--------------|
| H | 2.554020000  | -0.485613000 | -3.807790000 |
| H | 3.235522000  | 1.046275000  | -3.168848000 |
| H | 3.801418000  | -0.538773000 | -2.546805000 |
| C | -2.931186000 | -0.025695000 | -2.910668000 |
| H | -2.554020000 | 0.485613000  | -3.807790000 |
| H | -3.235522000 | -1.046275000 | -3.168848000 |
| H | -3.801418000 | 0.538773000  | -2.546805000 |
| C | -2.931186000 | 0.025695000  | 2.910668000  |
| H | -3.235522000 | 1.046275000  | 3.168848000  |
| H | -3.801418000 | -0.538773000 | 2.546805000  |
| H | -2.554020000 | -0.485613000 | 3.807790000  |
| C | 2.931186000  | -0.025695000 | 2.910668000  |
| H | 3.235522000  | -1.046275000 | 3.168848000  |
| H | 3.801418000  | 0.538773000  | 2.546805000  |
| H | 2.554020000  | 0.485613000  | 3.807790000  |
| C | 0.000000000  | -3.498369000 | 0.000000000  |
| N | 0.000000000  | -4.675022000 | 0.000000000  |
| C | 0.000000000  | 3.498369000  | 0.000000000  |
| N | 0.000000000  | 4.675022000  | 0.000000000  |

**CuPCH3.2CN: T<sub>M</sub>(D<sub>2</sub>): ADF (-7.94619279)**

**symmetry D(2)**

**occupations**

**A 20.0 // 20.0**

**B1 18.0 // 18.0**

**B2 20.0 // 18.0**

**B3 18.0 // 18.0**

**end**

|    |              |              |              |
|----|--------------|--------------|--------------|
| Cu | 0.000000000  | -1.306914000 | 0.000000000  |
| Cu | 0.000000000  | 1.306914000  | 0.000000000  |
| O  | -1.414693000 | -1.128942000 | 1.554538000  |
| O  | -1.547925000 | -1.131972000 | -1.405339000 |
| O  | 1.547925000  | -1.131972000 | 1.405339000  |
| O  | 1.414693000  | -1.128942000 | -1.554538000 |
| C  | -1.887674000 | 0.004214000  | 1.887457000  |
| C  | -1.887674000 | -0.004214000 | -1.887457000 |
| O  | -1.547925000 | 1.131972000  | 1.405339000  |
| O  | 1.547925000  | 1.131972000  | -1.405339000 |
| C  | 1.887674000  | 0.004214000  | -1.887457000 |
| O  | -1.414693000 | 1.128942000  | -1.554538000 |
| O  | 1.414693000  | 1.128942000  | 1.554538000  |
| C  | 1.887674000  | -0.004214000 | 1.887457000  |
| C  | 2.960031000  | -0.000191000 | -2.960918000 |
| H  | 2.565935000  | -0.482111000 | -3.866844000 |
| H  | 3.290394000  | 1.017121000  | -3.198415000 |
| H  | 3.817429000  | -0.595346000 | -2.615456000 |
| C  | -2.960031000 | 0.000191000  | -2.960918000 |
| H  | -2.565935000 | 0.482111000  | -3.866844000 |
| H  | -3.290394000 | -1.017121000 | -3.198415000 |
| H  | -3.817429000 | 0.595346000  | -2.615456000 |
| C  | -2.960031000 | -0.000191000 | 2.960918000  |
| H  | -3.290394000 | 1.017121000  | 3.198415000  |
| H  | -3.817429000 | -0.595346000 | 2.615456000  |
| H  | -2.565935000 | -0.482111000 | 3.866844000  |
| C  | 2.960031000  | 0.000191000  | 2.960918000  |
| H  | 3.290394000  | -1.017121000 | 3.198415000  |
| H  | 3.817429000  | 0.595346000  | 2.615456000  |
| H  | 2.565935000  | 0.482111000  | 3.866844000  |
| C  | 0.000000000  | -3.333568000 | 0.000000000  |
| N  | 0.000000000  | -4.508519000 | 0.000000000  |

|   |             |             |             |
|---|-------------|-------------|-------------|
| C | 0.000000000 | 3.333568000 | 0.000000000 |
| N | 0.000000000 | 4.508519000 | 0.000000000 |

**CuPCH3.2NHC: T<sub>0</sub>(C<sub>2v</sub>): ADF (-12.97521013 a.u.)**

**symmetry C(2v)**

**occupations**

**A1 36.0 // 36.0**

**A2 18.0 // 16.0**

**B1 25.0 // 25.0**

**B2 25.0 // 25.0**

**end**

|    |              |              |              |
|----|--------------|--------------|--------------|
| Cu | 0.000000000  | 0.000000000  | 1.384800000  |
| O  | -1.446100000 | -1.432000000 | 1.135200000  |
| O  | 1.446100000  | 1.432000000  | 1.135200000  |
| O  | -1.446100000 | 1.432000000  | 1.135200000  |
| O  | 1.446100000  | -1.432000000 | 1.135200000  |
| C  | -1.844800000 | -1.845200000 | -0.000700000 |
| C  | -1.844800000 | 1.845200000  | -0.000700000 |
| Cu | 0.000000000  | 0.000000000  | -1.385600000 |
| O  | 1.436100000  | 1.444800000  | -1.137900000 |
| O  | -1.436100000 | -1.444800000 | -1.137900000 |
| O  | 1.436100000  | -1.444800000 | -1.137900000 |
| O  | -1.436100000 | 1.444800000  | -1.137900000 |
| C  | 1.844800000  | 1.845200000  | -0.000700000 |
| C  | 1.844800000  | -1.845200000 | -0.000700000 |
| C  | -2.888000000 | -2.942700000 | 0.002000000  |
| H  | -3.505900000 | -2.894300000 | -0.903000000 |
| H  | -2.371900000 | -3.915200000 | 0.014300000  |
| H  | -3.517800000 | -2.878200000 | 0.897800000  |
| C  | -2.888000000 | 2.942700000  | 0.002000000  |
| H  | -3.505900000 | 2.894300000  | -0.903000000 |
| H  | -3.517800000 | 2.878200000  | 0.897800000  |
| H  | -2.371900000 | 3.915200000  | 0.014300000  |
| C  | 2.888000000  | 2.942700000  | 0.002000000  |
| H  | 3.517800000  | 2.878200000  | 0.897800000  |
| H  | 3.505900000  | 2.894300000  | -0.903000000 |
| H  | 2.371900000  | 3.915200000  | 0.014300000  |
| C  | 2.888000000  | -2.942700000 | 0.002000000  |
| H  | 3.517800000  | -2.878200000 | 0.897800000  |
| H  | 2.371900000  | -3.915200000 | 0.014300000  |
| H  | 3.505900000  | -2.894300000 | -0.903000000 |
| C  | 0.000000000  | 0.000000000  | -3.573300000 |
| N  | -1.070100000 | 0.000000000  | -4.424400000 |
| N  | 1.070100000  | 0.000000000  | -4.424400000 |
| C  | 0.680500000  | 0.000000000  | -5.754700000 |
| C  | -0.680500000 | 0.000000000  | -5.754700000 |
| H  | -1.391000000 | 0.000000000  | -6.573000000 |
| H  | 1.391000000  | 0.000000000  | -6.573000000 |
| C  | 0.000000000  | 0.000000000  | 3.574400000  |
| N  | 0.000000000  | -1.070300000 | 4.425600000  |
| N  | 0.000000000  | 1.070300000  | 4.425600000  |
| C  | 0.000000000  | 0.680700000  | 5.756000000  |
| C  | 0.000000000  | -0.680700000 | 5.756000000  |
| H  | 0.000000000  | -1.391600000 | 6.574200000  |
| H  | 0.000000000  | 1.391600000  | 6.574200000  |
| C  | 0.000000000  | 2.467400000  | 3.998700000  |
| H  | 0.000000000  | 2.489900000  | 2.905300000  |
| H  | -0.896800000 | 2.972600000  | 4.381700000  |
| H  | 0.896800000  | 2.972600000  | 4.381700000  |
| C  | 0.000000000  | -2.467400000 | 3.998700000  |

|   |              |              |              |
|---|--------------|--------------|--------------|
| H | -0.896800000 | -2.972600000 | 4.381700000  |
| H | 0.000000000  | -2.489900000 | 2.905300000  |
| H | 0.896800000  | -2.972600000 | 4.381700000  |
| C | 2.466900000  | 0.000000000  | -3.997100000 |
| H | 2.488500000  | 0.000000000  | -2.903900000 |
| H | 2.972500000  | -0.896500000 | -4.380000000 |
| H | 2.972500000  | 0.896500000  | -4.380000000 |
| C | -2.466900000 | 0.000000000  | -3.997100000 |
| H | -2.488500000 | 0.000000000  | -2.903900000 |
| H | -2.972500000 | 0.896500000  | -4.380000000 |
| H | -2.972500000 | -0.896500000 | -4.380000000 |

**CuPCH3.2NHC: T<sub>M</sub>(C<sub>2v</sub>): ADF (-12.97515986)**

**symmetry C(2v)**

**occupations**

**A1 36.0 // 35.0**

**A2 18.0 // 17.0**

**B1 25.0 // 25.0**

**B2 25.0 // 25.0**

**end**

|    |              |              |              |
|----|--------------|--------------|--------------|
| Cu | 0.000000000  | 0.000000000  | 1.338100000  |
| O  | -1.495000000 | -1.454300000 | 1.136200000  |
| O  | 1.495000000  | 1.454300000  | 1.136200000  |
| O  | -1.495000000 | 1.454300000  | 1.136200000  |
| O  | 1.495000000  | -1.454300000 | 1.136200000  |
| C  | -1.885700000 | -1.876600000 | 0.002700000  |
| C  | -1.885700000 | 1.876600000  | 0.002700000  |
| Cu | 0.000000000  | 0.000000000  | -1.342800000 |
| O  | 1.463300000  | 1.493000000  | -1.133400000 |
| O  | -1.463300000 | -1.493000000 | -1.133400000 |
| O  | 1.463300000  | -1.493000000 | -1.133400000 |
| O  | -1.463300000 | 1.493000000  | -1.133400000 |
| C  | 1.885700000  | 1.876600000  | 0.002700000  |
| C  | 1.885700000  | -1.876600000 | 0.002700000  |
| C  | -2.940600000 | -2.969100000 | 0.007900000  |
| H  | -3.552100000 | -2.926000000 | -0.901700000 |
| H  | -2.431700000 | -3.945200000 | 0.032700000  |
| H  | -3.576800000 | -2.893800000 | 0.898200000  |
| C  | -2.940600000 | 2.969100000  | 0.007900000  |
| H  | -3.552100000 | 2.926000000  | -0.901700000 |
| H  | -3.576800000 | 2.893800000  | 0.898200000  |
| H  | -2.431700000 | 3.945200000  | 0.032700000  |
| C  | 2.940600000  | 2.969100000  | 0.007900000  |
| H  | 3.576800000  | 2.893800000  | 0.898200000  |
| H  | 3.552100000  | 2.926000000  | -0.901700000 |
| H  | 2.431700000  | 3.945200000  | 0.032700000  |
| C  | 2.940600000  | -2.969100000 | 0.007900000  |
| H  | 3.576800000  | -2.893800000 | 0.898200000  |
| H  | 2.431700000  | -3.945200000 | 0.032700000  |
| H  | 3.552100000  | -2.926000000 | -0.901700000 |
| C  | 0.000000000  | 0.000000000  | -3.413300000 |
| N  | -1.075000000 | 0.000000000  | -4.251200000 |
| N  | 1.075000000  | 0.000000000  | -4.251200000 |
| C  | 0.680300000  | 0.000000000  | -5.578500000 |
| C  | -0.680300000 | 0.000000000  | -5.578500000 |
| H  | -1.391500000 | 0.000000000  | -6.395800000 |
| H  | 1.391500000  | 0.000000000  | -6.395800000 |
| C  | 0.000000000  | 0.000000000  | 3.409200000  |
| N  | 0.000000000  | -1.075100000 | 4.246100000  |
| N  | 0.000000000  | 1.075100000  | 4.246100000  |

|   |              |              |              |
|---|--------------|--------------|--------------|
| C | 0.000000000  | 0.680500000  | 5.573800000  |
| C | 0.000000000  | -0.680500000 | 5.573800000  |
| H | 0.000000000  | -1.392600000 | 6.390500000  |
| H | 0.000000000  | 1.392600000  | 6.390500000  |
| C | 0.000000000  | 2.476200000  | 3.827600000  |
| H | 0.000000000  | 2.510800000  | 2.735700000  |
| H | -0.897100000 | 2.973800000  | 4.218500000  |
| H | 0.897100000  | 2.973800000  | 4.218500000  |
| C | 0.000000000  | -2.476200000 | 3.827600000  |
| H | -0.897100000 | -2.973800000 | 4.218500000  |
| H | 0.000000000  | -2.510800000 | 2.735700000  |
| H | 0.897100000  | -2.973800000 | 4.218500000  |
| C | 2.476200000  | 0.000000000  | -3.834100000 |
| H | 2.511700000  | 0.000000000  | -2.742400000 |
| H | 2.973500000  | -0.897100000 | -4.225700000 |
| H | 2.973500000  | 0.897100000  | -4.225700000 |
| C | -2.476200000 | 0.000000000  | -3.834100000 |
| H | -2.511700000 | 0.000000000  | -2.742400000 |
| H | -2.973500000 | 0.897100000  | -4.225700000 |
| H | -2.973500000 | -0.897100000 | -4.225700000 |

**CuPCF3.2NHC: T<sub>0</sub>(C<sub>2v</sub>): ADF (-13.10982211 a.u.)**

**symmetry C(2v)**

**occupations**

**A1 45.0 // 45.0**

**A2 27.0 // 25.0**

**B1 34.0 // 34.0**

**B2 34.0 // 34.0**

**end**

|    |              |              |              |
|----|--------------|--------------|--------------|
| Cu | 0.000000000  | 0.000000000  | 1.468200000  |
| O  | -1.437400000 | -1.432800000 | 1.129400000  |
| O  | 1.437400000  | 1.432800000  | 1.129400000  |
| O  | -1.437400000 | 1.432800000  | 1.129400000  |
| O  | 1.437400000  | -1.432800000 | 1.129400000  |
| C  | -1.803100000 | -1.808500000 | -0.015200000 |
| C  | -1.803100000 | 1.808500000  | -0.015200000 |
| Cu | 0.000000000  | 0.000000000  | -1.501700000 |
| O  | 1.435700000  | 1.438500000  | -1.159100000 |
| O  | -1.435700000 | -1.438500000 | -1.159100000 |
| O  | 1.435700000  | -1.438500000 | -1.159100000 |
| O  | -1.435700000 | 1.438500000  | -1.159100000 |
| C  | 1.803100000  | 1.808500000  | -0.015200000 |
| C  | 1.803100000  | -1.808500000 | -0.015200000 |
| C  | -2.871000000 | -2.943000000 | 0.013300000  |
| C  | -2.871000000 | 2.943000000  | 0.013300000  |
| C  | 2.871000000  | 2.943000000  | 0.013300000  |
| C  | 2.871000000  | -2.943000000 | 0.013300000  |
| C  | 0.000000000  | 0.000000000  | -3.636700000 |
| N  | -1.071600000 | 0.000000000  | -4.483600000 |
| N  | 1.071600000  | 0.000000000  | -4.483600000 |
| C  | 0.680400000  | 0.000000000  | -5.811300000 |
| C  | -0.680400000 | 0.000000000  | -5.811300000 |
| H  | -1.392100000 | 0.000000000  | -6.628300000 |
| H  | 1.392100000  | 0.000000000  | -6.628300000 |
| C  | 0.000000000  | 0.000000000  | 3.598900000  |
| N  | 0.000000000  | -1.071500000 | 4.445500000  |
| N  | 0.000000000  | 1.071500000  | 4.445500000  |
| C  | 0.000000000  | 0.680400000  | 5.773500000  |
| C  | 0.000000000  | -0.680400000 | 5.773500000  |
| H  | 0.000000000  | -1.392800000 | 6.590000000  |

|   |              |              |              |
|---|--------------|--------------|--------------|
| H | 0.000000000  | 1.392800000  | 6.590000000  |
| C | 0.000000000  | 2.471500000  | 4.028900000  |
| H | 0.000000000  | 2.511200000  | 2.937000000  |
| H | -0.897000000 | 2.972000000  | 4.416000000  |
| H | 0.897000000  | 2.972000000  | 4.416000000  |
| C | 0.000000000  | -2.471500000 | 4.028900000  |
| H | -0.897000000 | -2.972000000 | 4.416000000  |
| H | 0.000000000  | -2.511200000 | 2.937000000  |
| H | 0.897000000  | -2.972000000 | 4.416000000  |
| C | 2.471900000  | 0.000000000  | -4.067600000 |
| H | 2.513100000  | 0.000000000  | -2.975900000 |
| H | 2.972200000  | -0.896800000 | -4.455400000 |
| H | 2.972200000  | 0.896800000  | -4.455400000 |
| C | -2.471900000 | 0.000000000  | -4.067600000 |
| H | -2.513100000 | 0.000000000  | -2.975900000 |
| H | -2.972200000 | 0.896800000  | -4.455400000 |
| H | -2.972200000 | -0.896800000 | -4.455400000 |
| F | 3.461100000  | -3.121800000 | -1.189500000 |
| F | 3.838900000  | -2.672900000 | 0.927600000  |
| F | 2.276500000  | -4.117100000 | 0.373400000  |
| F | -3.461100000 | -3.121800000 | -1.189500000 |
| F | -2.276500000 | -4.117100000 | 0.373400000  |
| F | -3.838900000 | -2.672900000 | 0.927600000  |
| F | -3.838900000 | 2.672900000  | 0.927600000  |
| F | -3.461100000 | 3.121800000  | -1.189500000 |
| F | -2.276500000 | 4.117100000  | 0.373400000  |
| F | 3.838900000  | 2.672900000  | 0.927600000  |
| F | 2.276500000  | 4.117100000  | 0.373400000  |
| F | 3.461100000  | 3.121800000  | -1.189500000 |

**CuPCF3.2NHC:  $T_M(C_{2v})$ : ADF (-13.11965195 a.u.)**

**symmetry C(2v)**

**occupations**

**A1 45.0 // 44.0**

**A2 27.0 // 26.0**

**B1 34.0 // 34.0**

**B2 34.0 // 34.0**

**end**

|    |              |              |              |
|----|--------------|--------------|--------------|
| Cu | 0.000000000  | 0.000000000  | 1.403900000  |
| O  | -1.488700000 | -1.442900000 | 1.136300000  |
| O  | 1.488700000  | 1.442900000  | 1.136300000  |
| O  | -1.488700000 | 1.442900000  | 1.136300000  |
| O  | 1.488700000  | -1.442900000 | 1.136300000  |
| C  | -1.856800000 | -1.820500000 | -0.005600000 |
| C  | -1.856800000 | 1.820500000  | -0.005600000 |
| Cu | 0.000000000  | 0.000000000  | -1.442400000 |
| O  | 1.468900000  | 1.475600000  | -1.148300000 |
| O  | -1.468900000 | -1.475600000 | -1.148300000 |
| O  | 1.468900000  | -1.475600000 | -1.148300000 |
| O  | -1.468900000 | 1.475600000  | -1.148300000 |
| C  | 1.856800000  | 1.820500000  | -0.005600000 |
| C  | 1.856800000  | -1.820500000 | -0.005600000 |
| C  | -2.954000000 | -2.925800000 | 0.019600000  |
| C  | -2.954000000 | 2.925800000  | 0.019600000  |
| C  | 2.954000000  | 2.925800000  | 0.019600000  |
| C  | 2.954000000  | -2.925800000 | 0.019600000  |
| C  | 0.000000000  | 0.000000000  | -3.492700000 |
| N  | -1.076700000 | 0.000000000  | -4.323400000 |
| N  | 1.076700000  | 0.000000000  | -4.323400000 |
| C  | 0.680000000  | 0.000000000  | -5.649400000 |

|   |              |              |              |
|---|--------------|--------------|--------------|
| C | -0.680000000 | 0.000000000  | -5.649400000 |
| H | -1.392300000 | 0.000000000  | -6.465500000 |
| H | 1.392300000  | 0.000000000  | -6.465500000 |
| C | 0.000000000  | 0.000000000  | 3.454400000  |
| N | 0.000000000  | -1.077200000 | 4.283300000  |
| N | 0.000000000  | 1.077200000  | 4.283300000  |
| C | 0.000000000  | 0.680300000  | 5.609600000  |
| C | 0.000000000  | -0.680300000 | 5.609600000  |
| H | 0.000000000  | -1.393500000 | 6.425000000  |
| H | 0.000000000  | 1.393500000  | 6.425000000  |
| C | 0.000000000  | 2.479900000  | 3.869400000  |
| H | 0.000000000  | 2.525700000  | 2.778600000  |
| H | -0.897600000 | 2.974300000  | 4.261100000  |
| H | 0.897600000  | 2.974300000  | 4.261100000  |
| C | 0.000000000  | -2.479900000 | 3.869400000  |
| H | -0.897600000 | -2.974300000 | 4.261100000  |
| H | 0.000000000  | -2.525700000 | 2.778600000  |
| H | 0.897600000  | -2.974300000 | 4.261100000  |
| C | 2.480100000  | 0.000000000  | -3.912400000 |
| H | 2.529200000  | 0.000000000  | -2.821800000 |
| H | 2.973700000  | -0.897300000 | -4.306200000 |
| H | 2.973700000  | 0.897300000  | -4.306200000 |
| C | -2.480100000 | 0.000000000  | -3.912400000 |
| H | -2.529200000 | 0.000000000  | -2.821800000 |
| H | -2.973700000 | 0.897300000  | -4.306200000 |
| H | -2.973700000 | -0.897300000 | -4.306200000 |
| F | 3.624100000  | -3.012300000 | -1.153800000 |
| F | 3.860900000  | -2.699400000 | 1.005300000  |
| F | 2.370800000  | -4.137800000 | 0.262100000  |
| F | -3.624100000 | -3.012300000 | -1.153800000 |
| F | -2.370800000 | -4.137800000 | 0.262100000  |
| F | -3.860900000 | -2.699400000 | 1.005300000  |
| F | -3.860900000 | 2.699400000  | 1.005300000  |
| F | -2.370800000 | 4.137800000  | 0.262100000  |
| F | -3.624100000 | 3.012300000  | -1.153800000 |
| F | 3.860900000  | 2.699400000  | 1.005300000  |
| F | 2.370800000  | 4.137800000  | 0.262100000  |
| F | 3.624100000  | 3.012300000  | -1.153800000 |

**CuPCH3.2NHC: Symmetric TBP T<sub>M</sub>: ORCA (-4803.96162140 Eh)**

|    |              |              |              |
|----|--------------|--------------|--------------|
| Cu | 1.097364000  | 0.372482000  | -0.447739000 |
| O  | -0.314327000 | 0.277554000  | -2.051761000 |
| O  | 1.204952000  | -0.066626000 | 1.641484000  |
| O  | 0.469115000  | 2.234959000  | -0.036221000 |
| O  | 1.706743000  | -1.494323000 | -0.869962000 |
| C  | -1.494596000 | -0.133918000 | -2.230816000 |
| C  | -0.716042000 | 2.352087000  | 0.431902000  |
| Cu | -1.529168000 | -0.736241000 | 0.533971000  |
| O  | -0.776154000 | -0.866960000 | 2.391762000  |
| O  | -2.268629000 | -0.609130000 | -1.329261000 |
| O  | -0.250900000 | -2.330545000 | -0.095300000 |
| O  | -1.503726000 | 1.402045000  | 0.700160000  |
| C  | 0.433601000  | -0.481231000 | 2.551414000  |
| C  | 0.967063000  | -0.502465000 | 3.978025000  |
| H  | 2.011451000  | -0.870188000 | 3.987238000  |
| H  | 0.977766000  | 0.537143000  | 4.367099000  |
| H  | 0.335742000  | -1.123424000 | 4.639856000  |
| C  | 0.907004000  | -2.451479000 | -0.585910000 |
| C  | 4.633820000  | 1.619539000  | -2.427968000 |
| H  | 5.233800000  | 1.632974000  | -3.343596000 |

|   |              |              |              |
|---|--------------|--------------|--------------|
| N | 3.400212000  | 0.978692000  | -2.348831000 |
| C | 2.860680000  | 1.105180000  | -1.103822000 |
| N | 3.770398000  | 1.835012000  | -0.398922000 |
| C | 4.867673000  | 2.166722000  | -1.189316000 |
| H | 5.710457000  | 2.754620000  | -0.811667000 |
| C | -4.901071000 | -2.767224000 | 2.110567000  |
| H | -5.305351000 | -3.655742000 | 2.606152000  |
| N | -3.550785000 | -2.630592000 | 1.799625000  |
| C | -3.305398000 | -1.435468000 | 1.192254000  |
| N | -4.519553000 | -0.820641000 | 1.123158000  |
| C | -4.732388000 | 0.487910000  | 0.509516000  |
| H | -5.424198000 | 1.082648000  | 1.135664000  |
| H | -5.163768000 | 0.374364000  | -0.504284000 |
| H | -3.754341000 | 0.998488000  | 0.437970000  |
| C | -5.517370000 | -1.617786000 | 1.677843000  |
| H | -6.566325000 | -1.306928000 | 1.717934000  |
| C | 3.583287000  | 2.236968000  | 0.992982000  |
| H | 3.276658000  | 3.299725000  | 1.051056000  |
| H | 2.791993000  | 1.601749000  | 1.432193000  |
| H | 4.529909000  | 2.099941000  | 1.549407000  |
| C | 2.766657000  | 0.235253000  | -3.435082000 |
| H | 1.697350000  | 0.104353000  | -3.186121000 |
| H | 2.867896000  | 0.801611000  | -4.380272000 |
| H | 3.241412000  | -0.758532000 | -3.552606000 |
| C | -2.513446000 | -3.612919000 | 2.103781000  |
| H | -2.880059000 | -4.627894000 | 1.859295000  |
| H | -2.242354000 | -3.571297000 | 3.176869000  |
| H | -1.624291000 | -3.376074000 | 1.491236000  |
| C | 1.432548000  | -3.860217000 | -0.831843000 |
| H | 1.848631000  | -4.253484000 | 0.119543000  |
| H | 2.237319000  | -3.863003000 | -1.590306000 |
| H | 0.607950000  | -4.530321000 | -1.141038000 |
| C | -1.218250000 | 3.773760000  | 0.649774000  |
| H | -1.789192000 | 3.834359000  | 1.596514000  |
| H | -1.914201000 | 4.033318000  | -0.175218000 |
| H | -0.387154000 | 4.502767000  | 0.655813000  |
| C | -2.051435000 | -0.095793000 | -3.648207000 |
| H | -3.150662000 | -0.212892000 | -3.657427000 |
| H | -1.761576000 | 0.851201000  | -4.143502000 |
| H | -1.598556000 | -0.925954000 | -4.229548000 |

|     |       |                    |
|-----|-------|--------------------|
| 0:  | 0.00  | cm** <sup>-1</sup> |
| 1:  | 0.00  | cm** <sup>-1</sup> |
| 2:  | 0.00  | cm** <sup>-1</sup> |
| 3:  | 0.00  | cm** <sup>-1</sup> |
| 4:  | 0.00  | cm** <sup>-1</sup> |
| 5:  | 0.00  | cm** <sup>-1</sup> |
| 6:  | 14.50 | cm** <sup>-1</sup> |
| 7:  | 17.54 | cm** <sup>-1</sup> |
| 8:  | 26.27 | cm** <sup>-1</sup> |
| 9:  | 29.53 | cm** <sup>-1</sup> |
| 10: | 33.90 | cm** <sup>-1</sup> |
| 11: | 37.89 | cm** <sup>-1</sup> |
| 12: | 41.18 | cm** <sup>-1</sup> |

**CuPCH3.2NHC: Asymmetric TBP T<sub>M</sub>: ORCA (-4803.96120825 Eh)**

|    |              |              |             |
|----|--------------|--------------|-------------|
| Cu | -0.178189000 | 0.272126000  | 1.539137000 |
| O  | -1.668064000 | -1.070840000 | 1.484093000 |
| O  | 1.285877000  | 1.654157000  | 1.521618000 |
| O  | -1.459746000 | 1.628229000  | 0.646325000 |



|    |              |              |              |
|----|--------------|--------------|--------------|
| O  | 1.319054000  | -1.251364000 | 0.834838000  |
| C  | -1.969410000 | -1.530737000 | 0.325968000  |
| C  | -1.727714000 | 2.028258000  | -0.523671000 |
| Cu | 0.146613000  | 0.118597000  | -1.514469000 |
| O  | 1.598072000  | 1.426836000  | -0.711913000 |
| O  | -1.405461000 | -1.227078000 | -0.760105000 |
| O  | 1.462004000  | -1.388387000 | -1.419099000 |
| O  | -1.176737000 | 1.627334000  | -1.603419000 |
| C  | 1.868412000  | 1.928189000  | 0.415379000  |
| C  | 1.759281000  | -1.763157000 | -0.227956000 |
| C  | -3.136051000 | -2.510287000 | 0.275392000  |
| C  | -2.837467000 | 3.059487000  | -0.680556000 |
| C  | 2.961081000  | 2.988205000  | 0.482101000  |
| C  | 2.702927000  | -2.956266000 | -0.120768000 |
| C  | 0.069358000  | -0.063356000 | -3.521466000 |
| N  | -1.014048000 | -0.306956000 | -4.311090000 |
| N  | 1.116477000  | 0.049797000  | -4.386917000 |
| C  | 0.699749000  | -0.121577000 | -5.704219000 |
| C  | -0.655177000 | -0.345201000 | -5.655839000 |
| H  | -1.382156000 | -0.525576000 | -6.454330000 |
| H  | 1.389871000  | -0.071133000 | -6.552540000 |
| C  | 0.047106000  | -0.041698000 | 3.522887000  |
| N  | 0.157311000  | -1.227102000 | 4.187885000  |
| N  | 0.013302000  | 0.905584000  | 4.504957000  |
| C  | 0.094052000  | 0.326317000  | 5.767292000  |
| C  | 0.187027000  | -1.029608000 | 5.565149000  |
| H  | 0.284200000  | -1.857010000 | 6.275424000  |
| H  | 0.088996000  | 0.918422000  | 6.688331000  |
| C  | -0.146401000 | 2.335289000  | 4.245155000  |
| H  | 0.384558000  | 2.578197000  | 3.306995000  |
| H  | -1.219322000 | 2.593980000  | 4.143748000  |
| H  | 0.285914000  | 2.909438000  | 5.084761000  |
| C  | 0.207705000  | -2.533700000 | 3.533985000  |
| H  | 0.865155000  | -3.205891000 | 4.117067000  |
| H  | -0.807729000 | -2.971175000 | 3.468385000  |
| H  | 0.612427000  | -2.388249000 | 2.515094000  |
| C  | 2.492820000  | 0.296258000  | -3.966096000 |
| H  | 2.944688000  | 1.077540000  | -4.606320000 |
| H  | 2.474422000  | 0.634628000  | -2.914604000 |
| H  | 3.094423000  | -0.630606000 | -4.040114000 |
| C  | -2.375296000 | -0.454480000 | -3.800491000 |
| H  | -2.314327000 | -0.760996000 | -2.739689000 |
| H  | -2.920859000 | 0.506544000  | -3.874077000 |
| H  | -2.907243000 | -1.224773000 | -4.389798000 |
| H  | 3.248446000  | -3.134578000 | -1.065856000 |
| H  | 3.416840000  | -2.802780000 | 0.711649000  |
| H  | 2.102788000  | -3.859487000 | 0.117379000  |
| H  | -4.026341000 | -1.983102000 | -0.126879000 |
| H  | -2.899888000 | -3.339614000 | -0.419324000 |
| H  | -3.381691000 | -2.907720000 | 1.277299000  |
| H  | -2.881444000 | 3.724003000  | 0.202843000  |
| H  | -2.701000000 | 3.651002000  | -1.605201000 |
| H  | -3.807120000 | 2.523508000  | -0.754974000 |
| H  | 3.396819000  | 3.050070000  | 1.496530000  |
| H  | 2.512956000  | 3.974390000  | 0.237974000  |
| H  | 3.750633000  | 2.782059000  | -0.265284000 |

0: 0.00 cm\*\*-1  
1: 0.00 cm\*\*-1  
2: 0.00 cm\*\*-1  
3: 0.00 cm\*\*-1

|     |       |                    |
|-----|-------|--------------------|
| 4:  | 0.00  | cm** <sup>-1</sup> |
| 5:  | 0.00  | cm** <sup>-1</sup> |
| 6:  | 11.05 | cm** <sup>-1</sup> |
| 7:  | 18.03 | cm** <sup>-1</sup> |
| 8:  | 28.85 | cm** <sup>-1</sup> |
| 9:  | 31.88 | cm** <sup>-1</sup> |
| 10: | 35.20 | cm** <sup>-1</sup> |
| 11: | 37.31 | cm** <sup>-1</sup> |
| 12: | 41.49 | cm** <sup>-1</sup> |

**AZOGOL: [Zn<sub>2</sub>(O<sub>2</sub>CCH<sub>2</sub>Ph)<sub>4</sub>(NMe<sub>2</sub>NHC)<sub>2</sub>]: ORCA (-7242.98610438 Eh)**

|    |              |              |              |
|----|--------------|--------------|--------------|
| Zn | 3.938230000  | 16.615161000 | 5.676933000  |
| N  | 1.028353000  | 15.904828000 | 4.848262000  |
| O  | 4.625792000  | 15.106677000 | 4.425428000  |
| O  | 4.312647000  | 17.968203000 | 4.092885000  |
| C  | 1.868587000  | 16.678899000 | 5.602709000  |
| C  | -0.310579000 | 16.236398000 | 5.066144000  |
| H  | -1.129829000 | 15.724946000 | 4.551414000  |
| C  | 1.409431000  | 14.860375000 | 3.922968000  |
| C  | 1.508281000  | 13.533802000 | 4.398200000  |
| C  | 1.759721000  | 12.519586000 | 3.451553000  |
| H  | 1.828028000  | 11.476378000 | 3.802046000  |
| C  | 1.923426000  | 12.799477000 | 2.080010000  |
| C  | 1.854493000  | 14.144922000 | 1.660310000  |
| H  | 1.994283000  | 14.386411000 | 0.593123000  |
| C  | 1.604860000  | 15.196405000 | 2.563502000  |
| C  | 5.713114000  | 14.510884000 | 4.169228000  |
| C  | 1.383866000  | 13.220684000 | 5.868435000  |
| H  | 2.225616000  | 13.675971000 | 6.434519000  |
| H  | 1.404130000  | 12.128842000 | 6.046451000  |
| H  | 0.446266000  | 13.626792000 | 6.302700000  |
| C  | 2.204502000  | 11.695205000 | 1.085852000  |
| H  | 3.286466000  | 11.655286000 | 0.833523000  |
| H  | 1.659347000  | 11.853783000 | 0.133558000  |
| H  | 1.922138000  | 10.701658000 | 1.486483000  |
| C  | 1.577740000  | 16.634670000 | 2.107008000  |
| H  | 2.412028000  | 17.200737000 | 2.576577000  |
| H  | 0.636856000  | 17.146864000 | 2.399594000  |
| H  | 1.678174000  | 16.703989000 | 1.006274000  |
| H  | 5.955728000  | 12.391074000 | 3.950290000  |
| H  | 4.536651000  | 13.069735000 | 3.082250000  |
| C  | 6.427003000  | 13.273525000 | 2.037490000  |
| C  | 5.897390000  | 13.867094000 | 0.868820000  |
| H  | 4.879201000  | 14.287273000 | 0.896804000  |
| C  | 6.648402000  | 13.925842000 | -0.317757000 |
| H  | 6.214118000  | 14.389109000 | -1.218449000 |
| C  | 7.949880000  | 13.392347000 | -0.358876000 |
| H  | 8.538417000  | 13.434416000 | -1.289360000 |
| C  | 8.491597000  | 12.803270000 | 0.798017000  |
| H  | 9.509352000  | 12.382612000 | 0.778106000  |
| H  | 8.166451000  | 12.284092000 | 2.884936000  |
| C  | 5.607415000  | 13.228302000 | 3.309247000  |
| C  | 7.736480000  | 12.747784000 | 1.983036000  |
| O  | 6.874496000  | 14.844327000 | 4.559372000  |
| Zn | 7.151271000  | 16.547740000 | 5.786033000  |
| O  | 6.563904000  | 17.706414000 | 4.176658000  |
| C  | 5.495628000  | 18.161543000 | 3.673127000  |
| O  | 4.611653000  | 18.055433000 | 7.007595000  |
| C  | 5.701815000  | 18.559352000 | 7.410121000  |
| O  | 6.871842000  | 18.234177000 | 7.042685000  |

|   |              |              |              |
|---|--------------|--------------|--------------|
| O | 6.375979000  | 15.423795000 | 7.359739000  |
| C | 5.259806000  | 14.995267000 | 7.777254000  |
| O | 4.118344000  | 15.227435000 | 7.273114000  |
| C | -0.313069000 | 17.250528000 | 5.984620000  |
| N | 1.024323000  | 17.503409000 | 6.297127000  |
| C | 1.398593000  | 18.530427000 | 7.244756000  |
| C | 1.626819000  | 19.843277000 | 6.770589000  |
| C | 1.867487000  | 20.847954000 | 7.727410000  |
| H | 2.036441000  | 21.879872000 | 7.376915000  |
| C | 1.897227000  | 20.573339000 | 9.111334000  |
| C | 1.704060000  | 19.242395000 | 9.531430000  |
| H | 1.745095000  | 19.004373000 | 10.607604000 |
| C | 1.458611000  | 18.198383000 | 8.616152000  |
| C | 1.299981000  | 16.770653000 | 9.079098000  |
| H | 2.122948000  | 16.142836000 | 8.672123000  |
| H | 0.347513000  | 16.322378000 | 8.725861000  |
| H | 1.320847000  | 16.706710000 | 10.184466000 |
| C | 2.161281000  | 21.678759000 | 10.108926000 |
| H | 3.217512000  | 22.020148000 | 10.055009000 |
| H | 1.971328000  | 21.347336000 | 11.148870000 |
| H | 1.528888000  | 22.567901000 | 9.907813000  |
| C | 1.645327000  | 20.145225000 | 5.292728000  |
| H | 2.498353000  | 19.629554000 | 4.800018000  |
| H | 1.751227000  | 21.231227000 | 5.108926000  |
| H | 0.722036000  | 19.795571000 | 4.784621000  |
| H | -1.134994000 | 17.812326000 | 6.439061000  |
| C | 5.301590000  | 14.135909000 | 9.064402000  |
| H | 6.363727000  | 13.913593000 | 9.278146000  |
| H | 4.919944000  | 14.786443000 | 9.880888000  |
| C | 4.483845000  | 12.865019000 | 9.000742000  |
| C | 3.137607000  | 12.831035000 | 9.425486000  |
| H | 2.676038000  | 13.750342000 | 9.818819000  |
| C | 2.385079000  | 11.645378000 | 9.357886000  |
| H | 1.338438000  | 11.641840000 | 9.700949000  |
| C | 2.966557000  | 10.466123000 | 8.857302000  |
| H | 2.379914000  | 9.534854000  | 8.806106000  |
| C | 4.305450000  | 10.485780000 | 8.425363000  |
| H | 4.771348000  | 9.567725000  | 8.032194000  |
| C | 5.053682000  | 11.673578000 | 8.497106000  |
| H | 6.102060000  | 11.683206000 | 8.157184000  |
| C | 9.221622000  | 16.487168000 | 5.862628000  |
| N | 10.111884000 | 17.186158000 | 5.092509000  |
| C | 11.432562000 | 16.880206000 | 5.427315000  |
| C | 11.372148000 | 15.961303000 | 6.439215000  |
| N | 10.016326000 | 15.736421000 | 6.687424000  |
| C | 9.579240000  | 14.815513000 | 7.713471000  |
| C | 9.427990000  | 13.448617000 | 7.382412000  |
| C | 9.123068000  | 12.554199000 | 8.426834000  |
| H | 9.015280000  | 11.482319000 | 8.189826000  |
| C | 8.960039000  | 12.987673000 | 9.760083000  |
| C | 9.083263000  | 14.364479000 | 10.033238000 |
| H | 8.939052000  | 14.724995000 | 11.065114000 |
| C | 9.386318000  | 15.302511000 | 9.025118000  |
| C | 9.469027000  | 16.778765000 | 9.326654000  |
| H | 8.664821000  | 17.326827000 | 8.788956000  |
| H | 10.432303000 | 17.218629000 | 8.993473000  |
| H | 9.361183000  | 16.968365000 | 10.412020000 |
| C | 8.634635000  | 11.997803000 | 10.856080000 |
| H | 7.606264000  | 11.594404000 | 10.734561000 |
| H | 8.693193000  | 12.463669000 | 11.859231000 |
| H | 9.321427000  | 11.126500000 | 10.835686000 |

|   |              |              |              |
|---|--------------|--------------|--------------|
| C | 9.555164000  | 12.975225000 | 5.955196000  |
| H | 8.745673000  | 13.417965000 | 5.333323000  |
| H | 9.484184000  | 11.871659000 | 5.895400000  |
| H | 10.519292000 | 13.284500000 | 5.499563000  |
| H | 12.160868000 | 15.452273000 | 7.001857000  |
| H | 12.285196000 | 17.340705000 | 4.918721000  |
| C | 9.796352000  | 18.135318000 | 4.046938000  |
| C | 9.692877000  | 19.504781000 | 4.381822000  |
| C | 9.506853000  | 20.420512000 | 3.326872000  |
| H | 9.439286000  | 21.495129000 | 3.566343000  |
| C | 9.413015000  | 20.004811000 | 1.982272000  |
| C | 9.484505000  | 18.624397000 | 1.704153000  |
| H | 9.394401000  | 18.277506000 | 0.661344000  |
| C | 9.668493000  | 17.665678000 | 2.720445000  |
| C | 9.693693000  | 16.189645000 | 2.411451000  |
| H | 8.823154000  | 15.681050000 | 2.878848000  |
| H | 10.605423000 | 15.695209000 | 2.808052000  |
| H | 9.648434000  | 16.008881000 | 1.320869000  |
| C | 9.200175000  | 21.012050000 | 0.874562000  |
| H | 8.121886000  | 21.260816000 | 0.767061000  |
| H | 9.545529000  | 20.623956000 | -0.104111000 |
| H | 9.730791000  | 21.963602000 | 1.078777000  |
| C | 9.746766000  | 19.962763000 | 5.817706000  |
| H | 8.866426000  | 19.579654000 | 6.379309000  |
| H | 9.738573000  | 21.067546000 | 5.886279000  |
| H | 10.652216000 | 19.588771000 | 6.340665000  |
| C | 5.567453000  | 19.639050000 | 8.510766000  |
| H | 4.527055000  | 20.013199000 | 8.473179000  |
| H | 5.680937000  | 19.093953000 | 9.473275000  |
| C | 6.561016000  | 20.775044000 | 8.445346000  |
| C | 7.791677000  | 20.720398000 | 9.136222000  |
| H | 8.033999000  | 19.826075000 | 9.732690000  |
| C | 8.705956000  | 21.786977000 | 9.077806000  |
| H | 9.657890000  | 21.723210000 | 9.629265000  |
| C | 8.406334000  | 22.934325000 | 8.320814000  |
| H | 9.118593000  | 23.774151000 | 8.277509000  |
| C | 7.187319000  | 23.000815000 | 7.621468000  |
| H | 6.941805000  | 23.894997000 | 7.026271000  |
| C | 6.276778000  | 21.931787000 | 7.684810000  |
| H | 5.324429000  | 21.991560000 | 7.133723000  |
| C | 5.657540000  | 19.005483000 | 2.385791000  |
| H | 6.740943000  | 19.172352000 | 2.237495000  |
| H | 5.293759000  | 18.366612000 | 1.552428000  |
| C | 4.902104000  | 20.316104000 | 2.393140000  |
| C | 3.610390000  | 20.427648000 | 1.834041000  |
| H | 3.145840000  | 19.540092000 | 1.375940000  |
| C | 2.914641000  | 21.649495000 | 1.851002000  |
| H | 1.908954000  | 21.712244000 | 1.406096000  |
| C | 3.500430000  | 22.788332000 | 2.432841000  |
| H | 2.959007000  | 23.747900000 | 2.444289000  |
| C | 4.785322000  | 22.691221000 | 2.998240000  |
| H | 5.253847000  | 23.577544000 | 3.455438000  |
| C | 5.476541000  | 21.467644000 | 2.978191000  |
| H | 6.480575000  | 21.397372000 | 3.426282000  |

|    |      |        |
|----|------|--------|
| 0: | 0.00 | cm**-1 |
| 1: | 0.00 | cm**-1 |
| 2: | 0.00 | cm**-1 |
| 3: | 0.00 | cm**-1 |
| 4: | 0.00 | cm**-1 |
| 5: | 0.00 | cm**-1 |

6: -10.03 cm\*\*<sup>-1</sup>  
 7: 5.17 cm\*\*<sup>-1</sup>  
 8: 9.29 cm\*\*<sup>-1</sup>  
 9: 10.07 cm\*\*<sup>-1</sup>  
 10: 12.16 cm\*\*<sup>-1</sup>  
 11: 13.29 cm\*\*<sup>-1</sup>  
 12: 15.03 cm\*\*<sup>-1</sup>

The single negative value corresponds to a mesityl para-methyl group rotation which we do not consider significant.

**AZOGOL[Cu]: [Cu<sub>2</sub>(O<sub>2</sub>CCH<sub>2</sub>Ph)<sub>4</sub>(NMe<sub>s</sub><sub>2</sub>NHC)<sub>2</sub>]: T<sub>M</sub> ORCA (-6965.69749889)**

|    |              |              |              |
|----|--------------|--------------|--------------|
| Cu | -0.000000000 | -0.000000000 | 1.582852000  |
| N  | -0.434481000 | -0.986990000 | 4.402243000  |
| O  | -0.209735000 | -1.928356000 | 0.682783000  |
| O  | -1.987559000 | 0.255216000  | 1.564842000  |
| C  | -0.000051000 | -0.000045000 | 3.570130000  |
| C  | -0.275991000 | -0.627774000 | 5.744029000  |
| H  | -0.562971000 | -1.292734000 | 6.564086000  |
| C  | -0.995415000 | -2.230465000 | 3.943259000  |
| C  | -0.127297000 | -3.248419000 | 3.497641000  |
| C  | -0.713657000 | -4.453083000 | 3.064024000  |
| H  | -0.051637000 | -5.261249000 | 2.713006000  |
| C  | -2.109128000 | -4.640134000 | 3.043579000  |
| C  | -2.935137000 | -3.584594000 | 3.479479000  |
| H  | -4.029599000 | -3.700085000 | 3.433439000  |
| C  | -2.401295000 | -2.362267000 | 3.923398000  |
| C  | -0.444196000 | -2.488874000 | -0.415078000 |
| C  | 1.359103000  | -3.032098000 | 3.425117000  |
| H  | 1.598723000  | -2.310085000 | 2.616804000  |
| H  | 1.889834000  | -3.974679000 | 3.195409000  |
| H  | 1.765550000  | -2.605942000 | 4.365243000  |
| C  | -2.716328000 | -5.903535000 | 2.485391000  |
| H  | -3.019815000 | -5.739915000 | 1.427339000  |
| H  | -3.628128000 | -6.201477000 | 3.041558000  |
| H  | -1.999431000 | -6.748162000 | 2.501660000  |
| C  | -3.285642000 | -1.192098000 | 4.270624000  |
| H  | -3.092091000 | -0.369484000 | 3.547929000  |
| H  | -3.083179000 | -0.795785000 | 5.286934000  |
| H  | -4.354669000 | -1.473038000 | 4.214442000  |
| H  | -0.775961000 | -4.467701000 | -1.256872000 |
| H  | -0.814777000 | -4.368419000 | 0.547798000  |
| C  | -2.616542000 | -3.672319000 | -0.444221000 |
| C  | -3.243674000 | -2.735263000 | 0.405130000  |
| H  | -2.630789000 | -2.158177000 | 1.109985000  |
| C  | -4.629304000 | -2.528733000 | 0.340239000  |
| H  | -5.099108000 | -1.789642000 | 1.007969000  |
| C  | -5.415481000 | -3.255559000 | -0.572107000 |
| H  | -6.503049000 | -3.090075000 | -0.626165000 |
| C  | -4.800545000 | -4.194400000 | -1.419147000 |
| H  | -5.404067000 | -4.767044000 | -2.141099000 |
| H  | -2.930742000 | -5.122161000 | -2.032403000 |
| C  | -1.111713000 | -3.863684000 | -0.392995000 |
| C  | -3.410667000 | -4.396629000 | -1.356018000 |
| O  | -0.255043000 | -1.988835000 | -1.581808000 |
| Cu | 0.000025000  | -0.000000000 | -1.600469000 |
| O  | -1.931886000 | 0.217192000  | -0.701280000 |
| C  | -2.488072000 | 0.450018000  | 0.399133000  |
| O  | 0.209711000  | 1.928322000  | 0.682810000  |
| C  | 0.444196000  | 2.488862000  | -0.415040000 |
| O  | 0.255077000  | 1.988839000  | -1.581780000 |

|   |              |              |              |
|---|--------------|--------------|--------------|
| O | 1.931915000  | -0.217212000 | -0.701241000 |
| C | 2.488084000  | -0.450047000 | 0.399178000  |
| O | 1.987555000  | -0.255258000 | 1.564880000  |
| C | 0.275574000  | 0.627712000  | 5.744046000  |
| N | 0.434261000  | 0.986921000  | 4.402278000  |
| C | 0.995239000  | 2.230399000  | 3.943352000  |
| C | 0.127159000  | 3.248375000  | 3.497702000  |
| C | 0.713554000  | 4.453038000  | 3.064133000  |
| H | 0.051571000  | 5.261220000  | 2.713085000  |
| C | 2.109029000  | 4.640065000  | 3.043763000  |
| C | 2.934999000  | 3.584507000  | 3.479691000  |
| H | 4.029465000  | 3.699984000  | 3.433706000  |
| C | 2.401125000  | 2.362177000  | 3.923565000  |
| C | 3.285429000  | 1.191980000  | 4.270814000  |
| H | 3.091948000  | 0.369407000  | 3.548054000  |
| H | 3.082855000  | 0.795606000  | 5.287076000  |
| H | 4.354463000  | 1.472924000  | 4.214755000  |
| C | 2.716265000  | 5.903468000  | 2.485625000  |
| H | 3.019773000  | 5.739871000  | 1.427576000  |
| H | 3.628053000  | 6.201380000  | 3.041826000  |
| H | 1.999386000  | 6.748110000  | 2.501901000  |
| C | -1.359237000 | 3.032065000  | 3.425096000  |
| H | -1.598809000 | 2.309967000  | 2.616849000  |
| H | -1.889940000 | 3.974629000  | 3.195250000  |
| H | -1.765743000 | 2.606031000  | 4.365252000  |
| H | 0.562276000  | 1.292705000  | 6.564174000  |
| C | 3.860027000  | -1.124901000 | 0.384585000  |
| H | 4.362393000  | -0.847507000 | -0.563060000 |
| H | 4.469425000  | -0.779519000 | 1.240953000  |
| C | 3.656057000  | -2.626486000 | 0.460766000  |
| C | 4.350238000  | -3.409620000 | 1.404417000  |
| H | 5.065005000  | -2.925031000 | 2.088292000  |
| C | 4.129434000  | -4.795052000 | 1.490753000  |
| H | 4.678132000  | -5.390817000 | 2.236486000  |
| C | 3.202615000  | -5.416596000 | 0.635960000  |
| H | 3.023718000  | -6.500739000 | 0.709589000  |
| C | 2.505406000  | -4.641646000 | -0.309137000 |
| H | 1.776724000  | -5.117017000 | -0.985046000 |
| C | 2.730822000  | -3.259991000 | -0.397547000 |
| H | 2.176685000  | -2.652703000 | -1.126086000 |
| C | 0.000069000  | 0.000012000  | -3.589406000 |
| N | -0.996814000 | 0.411202000  | -4.421762000 |
| C | -0.633857000 | 0.261514000  | -5.763644000 |
| C | 0.634104000  | -0.261284000 | -5.763620000 |
| N | 0.997005000  | -0.411097000 | -4.421733000 |
| C | 2.247859000  | -0.953678000 | -3.959861000 |
| C | 2.395584000  | -2.358044000 | -3.931733000 |
| C | 3.620533000  | -2.875962000 | -3.476207000 |
| H | 3.748905000  | -3.968938000 | -3.426452000 |
| C | 4.663816000  | -2.035661000 | -3.037479000 |
| C | 4.462796000  | -0.642310000 | -3.070260000 |
| H | 5.260891000  | 0.030631000  | -2.716662000 |
| C | 3.255032000  | -0.071686000 | -3.516759000 |
| C | 3.025634000  | 1.414139000  | -3.462230000 |
| H | 2.287259000  | 1.657280000  | -2.669523000 |
| H | 2.614539000  | 1.806962000  | -4.415161000 |
| H | 3.961058000  | 1.954060000  | -3.223301000 |
| C | 5.929126000  | -2.626714000 | -2.466277000 |
| H | 5.749368000  | -2.968641000 | -1.422938000 |
| H | 6.754115000  | -1.888058000 | -2.439593000 |
| H | 6.265693000  | -3.512425000 | -3.042158000 |

|   |              |              |              |
|---|--------------|--------------|--------------|
| C | 1.239377000  | -3.257378000 | -4.287530000 |
| H | 0.408530000  | -3.075662000 | -3.571372000 |
| H | 1.533595000  | -4.322751000 | -4.230365000 |
| H | 0.848511000  | -3.058745000 | -5.306786000 |
| H | 1.305596000  | -0.533666000 | -6.583540000 |
| H | -1.305297000 | 0.534113000  | -6.583536000 |
| C | -2.247665000 | 0.953796000  | -3.959909000 |
| C | -2.395395000 | 2.358160000  | -3.931796000 |
| C | -3.620339000 | 2.876094000  | -3.476280000 |
| H | -3.748727000 | 3.969068000  | -3.426556000 |
| C | -4.663624000 | 2.035801000  | -3.037549000 |
| C | -4.462602000 | 0.642454000  | -3.070347000 |
| H | -5.260721000 | -0.030456000 | -2.716761000 |
| C | -3.254845000 | 0.071808000  | -3.516829000 |
| C | -3.025479000 | -1.414026000 | -3.462330000 |
| H | -2.287007000 | -1.657207000 | -2.669724000 |
| H | -2.614539000 | -1.806867000 | -4.415324000 |
| H | -3.960898000 | -1.953916000 | -3.223306000 |
| C | -5.928936000 | 2.626843000  | -2.466347000 |
| H | -5.749209000 | 2.968705000  | -1.422978000 |
| H | -6.753950000 | 1.888207000  | -2.439733000 |
| H | -6.265463000 | 3.512589000  | -3.042195000 |
| C | -1.239210000 | 3.257489000  | -4.287637000 |
| H | -0.408297000 | 3.075710000  | -3.571578000 |
| H | -1.533401000 | 4.322865000  | -4.230396000 |
| H | -0.848428000 | 3.058903000  | -5.306931000 |
| C | 1.111715000  | 3.863670000  | -0.392902000 |
| H | 0.776021000  | 4.467702000  | -1.256790000 |
| H | 0.814729000  | 4.368406000  | 0.547875000  |
| C | 2.616546000  | 3.672292000  | -0.444048000 |
| C | 3.243613000  | 2.735208000  | 0.405314000  |
| H | 2.630683000  | 2.158112000  | 1.110120000  |
| C | 4.629237000  | 2.528633000  | 0.340479000  |
| H | 5.098984000  | 1.789507000  | 1.008213000  |
| C | 5.415481000  | 3.255439000  | -0.571825000 |
| H | 6.503033000  | 3.089876000  | -0.625870000 |
| C | 4.800615000  | 4.194333000  | -1.418857000 |
| H | 5.404184000  | 4.766989000  | -2.140762000 |
| C | 3.410740000  | 4.396610000  | -1.355780000 |
| H | 2.930895000  | 5.122211000  | -2.032148000 |
| C | -3.860013000 | 1.124867000  | 0.384534000  |
| H | -4.362390000 | 0.847466000  | -0.563102000 |
| H | -4.469409000 | 0.779486000  | 1.240904000  |
| C | -3.656073000 | 2.626457000  | 0.460714000  |
| C | -4.350302000 | 3.409576000  | 1.404342000  |
| H | -5.065055000 | 2.924966000  | 2.088217000  |
| C | -4.129557000 | 4.795017000  | 1.490661000  |
| H | -4.678290000 | 5.390765000  | 2.236381000  |
| C | -3.202759000 | 5.416588000  | 0.635867000  |
| H | -3.023923000 | 6.500742000  | 0.709482000  |
| C | -2.505482000 | 4.641650000  | -0.309187000 |
| H | -1.776799000 | 5.117034000  | -0.985089000 |
| C | -2.730836000 | 3.259984000  | -0.397576000 |
| H | -2.176654000 | 2.652703000  | -1.126087000 |

0: 0.00 cm\*\*-1  
1: 0.00 cm\*\*-1  
2: 0.00 cm\*\*-1  
3: 0.00 cm\*\*-1  
4: 0.00 cm\*\*-1  
5: 0.00 cm\*\*-1

6: 13.71 cm<sup>-1</sup>  
 7: 15.56 cm<sup>-1</sup>  
 8: 17.10 cm<sup>-1</sup>  
 9: 18.66 cm<sup>-1</sup>  
 10: 25.27 cm<sup>-1</sup>  
 11: 25.41 cm<sup>-1</sup>  
 12: 27.46 cm<sup>-1</sup>

**[Zn<sub>2</sub>(acetate)<sub>4</sub>(OH<sub>2</sub>)<sub>2</sub>]**: There is a passing reference in the manuscript to the possibility of local TBP geometry for zinc paddlewheels with axial oxygen donors. Below is the optimised structure (usual ORCA protocol).

**-4625.12659433 Eh**

0: 0.00 cm<sup>-1</sup>  
 1: 0.00 cm<sup>-1</sup>  
 2: 0.00 cm<sup>-1</sup>  
 3: 0.00 cm<sup>-1</sup>  
 4: 0.00 cm<sup>-1</sup>  
 5: 0.00 cm<sup>-1</sup>  
 6: 21.60 cm<sup>-1</sup>  
 7: 41.71 cm<sup>-1</sup>  
 8: 44.64 cm<sup>-1</sup>  
 9: 47.79 cm<sup>-1</sup>  
 10: 50.30 cm<sup>-1</sup>  
 11: 52.40 cm<sup>-1</sup>  
 12: 59.05 cm<sup>-1</sup>

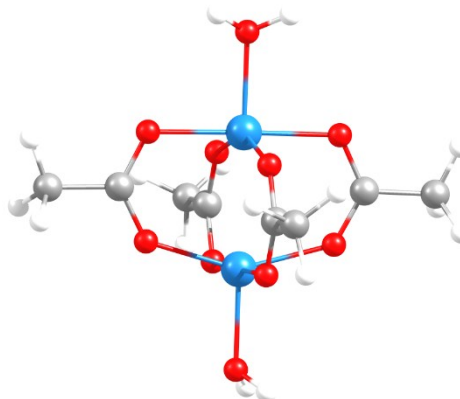

**CuPCH3.2NHC: Symmetric TBP BS: ORCA (-4803.962857050633 Eh)**

|    |              |              |              |
|----|--------------|--------------|--------------|
| Cu | -0.000053000 | -0.000236000 | -1.489618000 |
| Cu | -0.000041000 | -0.000772000 | 1.486881000  |
| O  | -2.026397000 | -0.056217000 | -0.790021000 |
| O  | 2.026286000  | 0.055745000  | -0.789913000 |
| O  | -0.071567000 | 1.998499000  | -1.479584000 |
| O  | 0.071436000  | -1.998947000 | -1.479827000 |
| C  | -2.586337000 | -0.099763000 | 0.339699000  |
| C  | -0.099627000 | 2.585526000  | -0.342608000 |
| O  | 1.998548000  | 0.074585000  | 1.476602000  |
| O  | -1.998613000 | -0.076251000 | 1.476480000  |
| O  | 0.060840000  | -2.025830000 | 0.786678000  |
| O  | -0.060516000 | 2.024710000  | 0.786904000  |
| C  | 2.586247000  | 0.098699000  | 0.339819000  |
| C  | 4.105182000  | 0.224059000  | 0.373873000  |
| H  | 4.556236000  | -0.414832000 | -0.409618000 |
| H  | 4.377550000  | 1.275424000  | 0.144421000  |
| H  | 4.512971000  | -0.038909000 | 1.367054000  |
| C  | 0.099796000  | -2.586286000 | -0.343021000 |
| C  | -0.576745000 | -0.373112000 | -5.684691000 |
| H  | -1.178079000 | -0.765092000 | -6.511331000 |
| N  | -0.908170000 | -0.585104000 | -4.349109000 |
| C  | -0.000086000 | 0.000039000  | -3.517696000 |
| N  | 0.907872000  | 0.585687000  | -4.348893000 |
| C  | 0.576245000  | 0.374506000  | -5.684551000 |
| H  | 1.177457000  | 0.766983000  | -6.511044000 |
| C  | 0.376936000  | -0.573384000 | 5.682453000  |
| H  | 0.772203000  | -1.172325000 | 6.509264000  |
| N  | 0.589469000  | -0.904862000 | 4.346983000  |
| C  | -0.000072000 | 0.000103000  | 3.515239000  |
| N  | -0.589259000 | 0.906009000  | 4.346195000  |



|   |              |              |              |
|---|--------------|--------------|--------------|
| C | -1.374225000 | 2.045278000  | 3.876868000  |
| H | -1.144750000 | 2.932951000  | 4.496200000  |
| H | -2.457312000 | 1.823277000  | 3.944246000  |
| H | -1.105288000 | 2.239623000  | 2.822224000  |
| C | -0.376118000 | 0.576054000  | 5.681949000  |
| H | -0.771054000 | 1.175884000  | 6.508285000  |
| C | 2.051049000  | 1.365117000  | -3.879804000 |
| H | 1.834132000  | 2.449272000  | -3.946728000 |
| H | 2.244812000  | 1.094894000  | -2.825345000 |
| H | 2.937360000  | 1.131745000  | -4.499662000 |
| C | -2.051310000 | -1.364775000 | -3.880331000 |
| H | -2.244637000 | -1.095500000 | -2.825551000 |
| H | -2.937811000 | -1.130663000 | -4.499640000 |
| H | -1.834605000 | -2.448903000 | -3.948385000 |
| C | 1.373868000  | -2.044903000 | 3.878632000  |
| H | 1.142356000  | -2.932609000 | 4.497201000  |
| H | 2.457114000  | -1.824270000 | 3.947896000  |
| H | 1.106388000  | -2.238634000 | 2.823510000  |
| C | 0.225687000  | -4.105164000 | -0.377105000 |
| H | 1.278580000  | -4.376845000 | -0.154325000 |
| H | -0.043160000 | -4.513406000 | -1.368449000 |
| H | -0.408002000 | -4.556296000 | 0.410458000  |
| C | -0.225163000 | 4.104448000  | -0.376171000 |
| H | 0.410852000  | 4.555208000  | 0.409745000  |
| H | -1.277313000 | 4.376467000  | -0.150348000 |
| H | 0.041173000  | 4.512807000  | -1.368134000 |
| C | -4.105278000 | -0.225086000 | 0.373690000  |
| H | -4.513029000 | 0.036717000  | 1.367189000  |
| H | -4.556301000 | 0.414807000  | -0.409009000 |
| H | -4.377726000 | -1.276146000 | 0.142952000  |

**[Cu(acetate)<sub>2</sub>(Me<sub>2</sub>NHC)]: ORCA BP/SVP/D3/COSMO optimised**

**E(BP/SVP/D3/COSMO):**

-2401.958860580890 Eh

**Gibbs correction:**

0.17567433 Eh

**G**

-2401.78318625

**E(B3LYP/TZVP/D3/COSMO@BP/SVP/D3/COSMO geom):**

-2402.288238835526 Eh

|    |              |              |             |
|----|--------------|--------------|-------------|
| C  | -2.417553869 | -4.119414482 | 4.567654140 |
| H  | -2.672623591 | -4.947167996 | 5.236212400 |
| C  | -2.187009855 | -1.955050198 | 3.928895937 |
| C  | -0.543089170 | 1.187242674  | 5.296194465 |
| C  | 0.460683059  | 1.779139624  | 6.259469284 |
| H  | 0.005096302  | 1.947115166  | 7.253877068 |
| H  | 0.873026318  | 2.723228910  | 5.857859372 |
| H  | 1.297149044  | 1.060210276  | 6.388958387 |
| O  | -1.427316362 | 0.365742431  | 5.761422147 |
| O  | -0.514074858 | 1.450139490  | 4.060415613 |
| N  | -2.552934846 | -2.788969785 | 4.944709556 |
| Cu | -2.235672089 | 0.003914734  | 3.922839485 |
| C  | -1.941479285 | -4.114370970 | 3.279033574 |
| H  | -1.683122937 | -4.936709510 | 2.605092011 |
| C  | -3.854737462 | 1.215607562  | 2.521687848 |
| C  | -4.864332034 | 1.828985947  | 1.583333892 |
| H  | -4.417408810 | 1.995345441  | 0.584240577 |
| H  | -5.257475315 | 2.776586705  | 1.994343404 |
| H  | -5.708126680 | 1.118586395  | 1.456093134 |
| O  | -3.066378102 | 0.298580585  | 2.071137235 |
| O  | -3.784757886 | 1.549371437  | 3.742984850 |
| N  | -1.814094330 | -2.781106577 | 2.909141670 |
| C  | -3.090395453 | -2.335027507 | 6.226487421 |

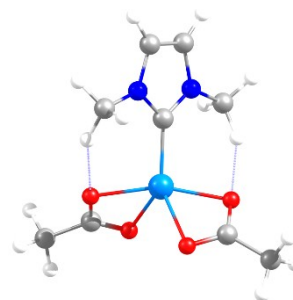

|   |              |              |             |
|---|--------------|--------------|-------------|
| H | -4.186400058 | -2.188599647 | 6.154897392 |
| H | -2.876842985 | -3.095237247 | 6.999528936 |
| H | -2.602943531 | -1.381746891 | 6.497074365 |
| C | -1.285871444 | -2.318773527 | 1.626497590 |
| H | -0.189478719 | -2.172703025 | 1.690237578 |
| H | -1.505929027 | -3.073896110 | 0.850220434 |
| H | -1.775939290 | -1.364772297 | 1.364520590 |

**CuPCH3.2Me<sub>2</sub>NHC:**

|                                                      |                   |
|------------------------------------------------------|-------------------|
| <b>E (BP/SVP/D3/COSMO):</b>                          | -4803.96162140 Eh |
| <b>Gibbs correction:</b>                             | 0.37932803 Eh     |
| <b>G</b>                                             | -4803.58229337    |
| <b>E (B3LYP/TZVP/D3/COSMO@BP/SVP/D3/COSMO geom):</b> | -4804.60134186 Eh |

**[Cu(acetate)<sub>2</sub>(Me<sub>2</sub>NHCCl<sub>2</sub>): ORCA BP/SVP/D3/COSMO optimised**

|    |              |              |             |
|----|--------------|--------------|-------------|
| C  | -1.875048112 | -3.999883605 | 4.766817379 |
| C  | -2.297605654 | -1.912581779 | 4.003152683 |
| C  | -0.691170304 | 0.814128516  | 5.175309794 |
| C  | 0.358275842  | 1.212864200  | 6.198858007 |
| H  | -0.084891755 | 1.830332209  | 7.003364175 |
| H  | 1.190323541  | 1.753264188  | 5.711219909 |
| H  | 0.763430649  | 0.292435457  | 6.669413491 |
| O  | -1.872355830 | 0.536011669  | 5.638440949 |
| O  | -0.420228355 | 0.729583663  | 3.952611910 |
| N  | -2.372402645 | -2.739391030 | 5.085304281 |
| Cu | -2.715543148 | -0.003195401 | 3.874101720 |
| C  | -1.466779407 | -3.943161313 | 3.448295192 |
| C  | -4.014155022 | 1.344223200  | 2.330928068 |
| C  | -4.776998697 | 2.201897383  | 1.359792780 |
| H  | -4.226830507 | 2.246166446  | 0.398003935 |
| H  | -4.917466164 | 3.223115296  | 1.757631068 |
| H  | -5.762916333 | 1.739464699  | 1.151781118 |
| O  | -3.760583371 | 0.116556764  | 2.053091217 |
| O  | -3.597659849 | 1.808577638  | 3.447528399 |
| N  | -1.739959901 | -2.654086662 | 3.002770739 |
| C  | -2.931944760 | -2.357784044 | 6.381005846 |
| H  | -4.008125962 | -2.613849562 | 6.427366354 |
| H  | -2.392385925 | -2.895543120 | 7.181187817 |
| H  | -2.782739952 | -1.269823322 | 6.499376622 |
| C  | -1.404840360 | -2.131963784 | 1.679712922 |
| H  | -0.339072608 | -1.834417946 | 1.645429792 |
| H  | -1.597031481 | -2.908802417 | 0.917706588 |
| H  | -2.048505299 | -1.255343917 | 1.489069672 |
| Cl | -1.826804737 | -5.311146467 | 5.859630276 |
| Cl | -0.759148483 | -5.156853124 | 2.477633999 |

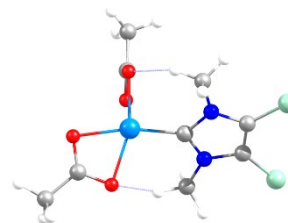

|     |       |                    |
|-----|-------|--------------------|
| 0:  | 0.00  | cm** <sup>-1</sup> |
| 1:  | 0.00  | cm** <sup>-1</sup> |
| 2:  | 0.00  | cm** <sup>-1</sup> |
| 3:  | 0.00  | cm** <sup>-1</sup> |
| 4:  | 0.00  | cm** <sup>-1</sup> |
| 5:  | 0.00  | cm** <sup>-1</sup> |
| 6:  | 17.25 | cm** <sup>-1</sup> |
| 7:  | 22.16 | cm** <sup>-1</sup> |
| 8:  | 29.31 | cm** <sup>-1</sup> |
| 9:  | 37.04 | cm** <sup>-1</sup> |
| 10: | 48.51 | cm** <sup>-1</sup> |
| 11: | 57.96 | cm** <sup>-1</sup> |
| 12: | 64.30 | cm** <sup>-1</sup> |

Electronic energy ... -3320.95749392 Eh  
Final Gibbs free enthalpy ... -3320.80227212 Eh

**CuPCH3.2Me<sub>2</sub>NHCCl<sub>2</sub>: ORCA BP/SVP/D3/COSMO optimised**

|    |              |              |              |
|----|--------------|--------------|--------------|
| Cu | 1.070148000  | 0.365584000  | -0.440675000 |
| O  | -0.287938000 | 0.276618000  | -2.074434000 |
| O  | 1.225597000  | -0.038565000 | 1.641283000  |
| O  | 0.446884000  | 2.228275000  | -0.039598000 |
| O  | 1.690546000  | -1.499733000 | -0.838120000 |
| C  | -1.480071000 | -0.107427000 | -2.245173000 |
| C  | -0.732387000 | 2.358174000  | 0.438984000  |
| Cu | -1.510945000 | -0.704875000 | 0.519215000  |
| O  | -0.756388000 | -0.854873000 | 2.370672000  |
| O  | -2.260622000 | -0.552958000 | -1.334855000 |
| O  | -0.292172000 | -2.323354000 | -0.119285000 |
| O  | -1.528281000 | 1.414439000  | 0.710261000  |
| C  | 0.451478000  | -0.470195000 | 2.542554000  |
| C  | 0.977990000  | -0.512082000 | 3.969752000  |
| H  | 2.031742000  | -0.851122000 | 3.976626000  |
| H  | 0.954999000  | 0.517112000  | 4.385056000  |
| H  | 0.358821000  | -1.166249000 | 4.610592000  |
| C  | 0.880002000  | -2.453497000 | -0.574337000 |
| C  | 4.627886000  | 1.585566000  | -2.422471000 |
| N  | 3.397057000  | 0.940382000  | -2.343301000 |
| C  | 2.849554000  | 1.100149000  | -1.103872000 |
| N  | 3.743941000  | 1.853591000  | -0.401075000 |
| C  | 4.846156000  | 2.169219000  | -1.190365000 |
| C  | -4.865121000 | -2.780804000 | 2.103713000  |
| N  | -3.517451000 | -2.634952000 | 1.787571000  |
| C  | -3.292951000 | -1.432358000 | 1.183423000  |
| N  | -4.510657000 | -0.820503000 | 1.118428000  |
| C  | -4.735929000 | 0.496144000  | 0.526996000  |
| H  | -5.379839000 | 1.097157000  | 1.196116000  |
| H  | -5.225937000 | 0.395789000  | -0.460658000 |
| H  | -3.750170000 | 0.982143000  | 0.411383000  |
| C  | -5.496614000 | -1.630302000 | 1.674857000  |
| C  | 3.549365000  | 2.277768000  | 0.983217000  |
| H  | 3.283987000  | 3.351828000  | 1.023085000  |
| H  | 2.727976000  | 1.670680000  | 1.405138000  |
| H  | 4.480179000  | 2.108740000  | 1.556437000  |
| C  | 2.773479000  | 0.179092000  | -3.422918000 |
| H  | 1.717064000  | 0.011618000  | -3.145087000 |
| H  | 2.831945000  | 0.756417000  | -4.364643000 |
| H  | 3.287512000  | -0.792372000 | -3.555763000 |
| C  | -2.474207000 | -3.617232000 | 2.071525000  |
| H  | -2.819589000 | -4.622828000 | 1.766414000  |
| H  | -2.235463000 | -3.623882000 | 3.152538000  |
| H  | -1.579512000 | -3.330327000 | 1.489777000  |
| C  | 1.399168000  | -3.865393000 | -0.804065000 |
| H  | 1.690040000  | -4.298453000 | 0.175790000  |
| H  | 2.282590000  | -3.868656000 | -1.468542000 |
| H  | 0.597338000  | -4.501782000 | -1.225317000 |
| C  | -1.216894000 | 3.782786000  | 0.666141000  |
| H  | -1.798824000 | 3.841056000  | 1.606015000  |
| H  | -1.896571000 | 4.061835000  | -0.165972000 |
| H  | -0.374362000 | 4.498010000  | 0.689934000  |
| C  | -2.040934000 | -0.072598000 | -3.659463000 |
| H  | -3.144645000 | -0.134198000 | -3.658900000 |
| H  | -1.706278000 | 0.846051000  | -4.178600000 |
| H  | -1.636829000 | -0.940422000 | -4.221437000 |

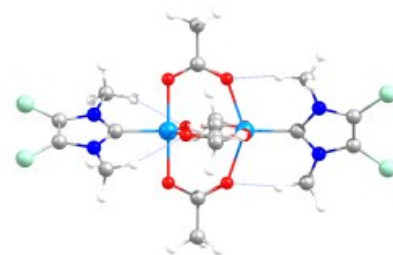

|    |              |              |              |
|----|--------------|--------------|--------------|
| C1 | -5.523157000 | -4.160261000 | 2.873841000  |
| C1 | -7.149790000 | -1.197696000 | 1.768781000  |
| C1 | 5.611479000  | 1.601412000  | -3.822941000 |
| C1 | 6.173339000  | 3.105037000  | -0.650145000 |

|     |       |                    |
|-----|-------|--------------------|
| 0:  | 0.00  | cm** <sup>-1</sup> |
| 1:  | 0.00  | cm** <sup>-1</sup> |
| 2:  | 0.00  | cm** <sup>-1</sup> |
| 3:  | 0.00  | cm** <sup>-1</sup> |
| 4:  | 0.00  | cm** <sup>-1</sup> |
| 5:  | 0.00  | cm** <sup>-1</sup> |
| 6:  | 10.91 | cm** <sup>-1</sup> |
| 7:  | 12.16 | cm** <sup>-1</sup> |
| 8:  | 19.29 | cm** <sup>-1</sup> |
| 9:  | 21.04 | cm** <sup>-1</sup> |
| 10: | 23.38 | cm** <sup>-1</sup> |
| 11: | 26.47 | cm** <sup>-1</sup> |
| 12: | 35.43 | cm** <sup>-1</sup> |

Electronic energy ... -6641.95961441 Eh  
 Final Gibbs free enthalpy ... -6641.62129803 Eh

**[Cu(acetate)<sub>2</sub>(Me<sub>2</sub>NCNMe<sub>2</sub>)] : ORCA BP/SVP/D3/COSMO optimised**

|    |              |              |             |
|----|--------------|--------------|-------------|
| C  | -2.380271000 | -1.983198000 | 3.964052000 |
| C  | -0.744381000 | 0.953796000  | 4.692893000 |
| C  | 0.441220000  | 1.474243000  | 5.492880000 |
| H  | 0.102648000  | 2.054025000  | 6.373141000 |
| H  | 1.100712000  | 2.092220000  | 4.855997000 |
| H  | 1.025724000  | 0.609076000  | 5.870743000 |
| O  | -1.762389000 | 0.539296000  | 5.378963000 |
| O  | -0.714559000 | 0.908317000  | 3.438661000 |
| N  | -2.815320000 | -2.733438000 | 4.992862000 |
| Cu | -2.919637000 | -0.093176000 | 3.825615000 |
| C  | -4.598952000 | 1.095156000  | 2.517969000 |
| C  | -5.571412000 | 1.856078000  | 1.652439000 |
| H  | -5.027529000 | 2.248364000  | 0.767463000 |
| H  | -6.001596000 | 2.712838000  | 2.203355000 |
| H  | -6.373301000 | 1.188209000  | 1.284862000 |
| O  | -4.323490000 | -0.129512000 | 2.249605000 |
| O  | -4.014665000 | 1.661189000  | 3.501979000 |
| N  | -1.531144000 | -2.478917000 | 3.046572000 |
| C  | -3.514229000 | -2.086517000 | 6.105549000 |
| H  | -4.613467000 | -2.222889000 | 6.015095000 |
| H  | -3.182757000 | -2.540339000 | 7.061231000 |
| H  | -3.260817000 | -1.012368000 | 6.128131000 |
| C  | -1.334675000 | -1.749599000 | 1.790286000 |
| H  | -0.409942000 | -1.138324000 | 1.832594000 |
| H  | -1.260898000 | -2.476639000 | 0.956701000 |
| H  | -2.200221000 | -1.087809000 | 1.608063000 |
| C  | -0.559808000 | -3.555048000 | 3.282711000 |
| H  | -0.835383000 | -4.496905000 | 2.765172000 |
| H  | 0.422195000  | -3.220953000 | 2.891503000 |
| H  | -0.449393000 | -3.745623000 | 4.363758000 |
| C  | -2.891146000 | -4.200290000 | 4.997885000 |
| H  | -2.117719000 | -4.661958000 | 5.645512000 |
| H  | -3.886854000 | -4.491267000 | 5.388089000 |
| H  | -2.797650000 | -4.593645000 | 3.971271000 |

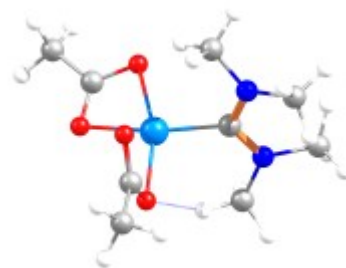

|    |      |                    |
|----|------|--------------------|
| 0: | 0.00 | cm** <sup>-1</sup> |
| 1: | 0.00 | cm** <sup>-1</sup> |
| 2: | 0.00 | cm** <sup>-1</sup> |

3: 0.00 cm\*\*<sup>-1</sup>  
 4: 0.00 cm\*\*<sup>-1</sup>  
 5: 0.00 cm\*\*<sup>-1</sup>  
 6: 14.42 cm\*\*<sup>-1</sup>  
 7: 29.66 cm\*\*<sup>-1</sup>  
 8: 34.68 cm\*\*<sup>-1</sup>  
 9: 35.34 cm\*\*<sup>-1</sup>  
 10: 43.18 cm\*\*<sup>-1</sup>  
 11: 56.19 cm\*\*<sup>-1</sup>

Electronic energy ... -2404.34561909 Eh  
 Final Gibbs free enthalpy ... -2404.12934639 Eh

**CuPCH3.2Me<sub>2</sub>CNMe<sub>2</sub>: ORCA BP/SVP/D3/COSMO optimimised**

|    |              |              |              |
|----|--------------|--------------|--------------|
| Cu | 1.074386000  | 0.575893000  | -0.562988000 |
| O  | -0.507920000 | 0.411698000  | -2.056347000 |
| O  | 1.140861000  | -0.005998000 | 1.536210000  |
| O  | 0.377423000  | 2.422275000  | -0.168534000 |
| O  | 1.757215000  | -1.270880000 | -0.983068000 |
| C  | -1.656280000 | -0.082612000 | -2.226610000 |
| C  | -0.790680000 | 2.487812000  | 0.358032000  |
| Cu | -1.617875000 | -0.676561000 | 0.529574000  |
| O  | -0.827659000 | -0.758180000 | 2.368859000  |
| O  | -2.397150000 | -0.595710000 | -1.318785000 |
| O  | -0.203196000 | -2.148490000 | -0.262632000 |
| O  | -1.508874000 | 1.506455000  | 0.686732000  |
| C  | 0.402370000  | -0.412801000 | 2.470629000  |
| C  | 1.011580000  | -0.502234000 | 3.868343000  |
| H  | 1.933508000  | -1.116888000 | 3.831128000  |
| H  | 1.310397000  | 0.513494000  | 4.199600000  |
| H  | 0.304079000  | -0.934945000 | 4.599518000  |
| C  | 0.971674000  | -2.244189000 | -0.710505000 |
| N  | 3.285546000  | 1.178425000  | -2.449566000 |
| C  | 2.904859000  | 1.262665000  | -1.160832000 |
| N  | 3.801189000  | 1.614090000  | -0.212935000 |
| N  | -3.317167000 | -2.608226000 | 1.976035000  |
| C  | -3.346849000 | -1.484026000 | 1.231906000  |
| N  | -4.530102000 | -0.898334000 | 0.958373000  |
| C  | -4.577733000 | 0.484846000  | 0.485307000  |
| H  | -5.297779000 | 1.058968000  | 1.106593000  |
| H  | -4.915416000 | 0.521464000  | -0.571389000 |
| H  | -3.578029000 | 0.948460000  | 0.564155000  |
| C  | 3.320909000  | 2.097238000  | 1.083332000  |
| H  | 3.938240000  | 2.965126000  | 1.395936000  |
| H  | 2.265973000  | 2.405833000  | 0.990365000  |
| H  | 3.390387000  | 1.302014000  | 1.854206000  |
| C  | 2.426297000  | 0.509350000  | -3.426752000 |
| H  | 1.423732000  | 0.334361000  | -2.996019000 |
| H  | 2.336929000  | 1.143013000  | -4.333283000 |
| H  | 2.864069000  | -0.466717000 | -3.724824000 |
| C  | -2.126793000 | -3.458126000 | 1.982601000  |
| H  | -2.427827000 | -4.509217000 | 1.786045000  |
| H  | -1.623361000 | -3.412626000 | 2.970728000  |
| H  | -1.419859000 | -3.128579000 | 1.200040000  |
| C  | 1.537654000  | -3.644898000 | -0.927939000 |
| H  | 1.785384000  | -4.084617000 | 0.060892000  |
| H  | 2.453200000  | -3.624786000 | -1.547654000 |
| H  | 0.773522000  | -4.295880000 | -1.395942000 |
| C  | -1.353647000 | 3.888413000  | 0.579302000  |
| H  | -1.793018000 | 3.962666000  | 1.593632000  |
| H  | -2.174855000 | 4.060909000  | -0.147306000 |

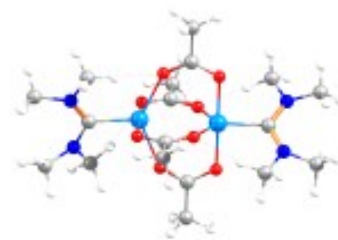

|   |              |              |              |
|---|--------------|--------------|--------------|
| H | -0.582529000 | 4.668608000  | 0.441385000  |
| C | -2.216904000 | -0.105071000 | -3.645871000 |
| H | -3.306539000 | -0.293477000 | -3.651833000 |
| H | -1.989903000 | 0.848949000  | -4.160480000 |
| H | -1.712528000 | -0.914956000 | -4.213719000 |
| C | -4.314989000 | -2.966817000 | 2.991721000  |
| H | -4.966414000 | -3.809589000 | 2.679348000  |
| H | -3.774082000 | -3.275775000 | 3.909302000  |
| H | -4.941487000 | -2.092814000 | 3.240395000  |
| C | -5.816506000 | -1.601964000 | 0.879809000  |
| H | -5.655754000 | -2.692474000 | 0.825351000  |
| H | -6.487640000 | -1.370612000 | 1.733191000  |
| H | -6.325986000 | -1.281080000 | -0.051563000 |
| C | 5.234754000  | 1.293630000  | -0.236137000 |
| H | 5.875253000  | 2.190047000  | -0.373010000 |
| H | 5.496838000  | 0.831917000  | 0.738072000  |
| H | 5.457183000  | 0.558721000  | -1.028111000 |
| C | 4.484232000  | 1.807917000  | -3.020075000 |
| H | 5.309552000  | 1.086296000  | -3.193749000 |
| H | 4.207447000  | 2.250491000  | -3.997410000 |
| H | 4.838694000  | 2.618798000  | -2.360653000 |

|     |       |                    |
|-----|-------|--------------------|
| 0:  | 0.00  | cm** <sup>-1</sup> |
| 1:  | 0.00  | cm** <sup>-1</sup> |
| 2:  | 0.00  | cm** <sup>-1</sup> |
| 3:  | 0.00  | cm** <sup>-1</sup> |
| 4:  | 0.00  | cm** <sup>-1</sup> |
| 5:  | 0.00  | cm** <sup>-1</sup> |
| 6:  | 22.39 | cm** <sup>-1</sup> |
| 7:  | 25.85 | cm** <sup>-1</sup> |
| 8:  | 27.41 | cm** <sup>-1</sup> |
| 9:  | 31.82 | cm** <sup>-1</sup> |
| 10: | 33.16 | cm** <sup>-1</sup> |
| 11: | 37.08 | cm** <sup>-1</sup> |
| 12: | 37.43 | cm** <sup>-1</sup> |

Electronic energy ... -4808.72368940 Eh  
 Final Gibbs free enthalpy ... -4808.26396323 Eh

### Reaction energy $\text{CuPCH3.2L} \rightarrow 2[\text{Cu}(\text{acetate})_2(\text{L})]$

The three carbenes (circled) were chosen based on the computational study of Magill et al.<sup>5</sup> which ranked a series of carbenes from most basic ( $\text{Me}_2\text{NCNMe}_2$ ) to least basic ( $\text{Me}_2\text{ImidCl}_2$  is equal least basic).

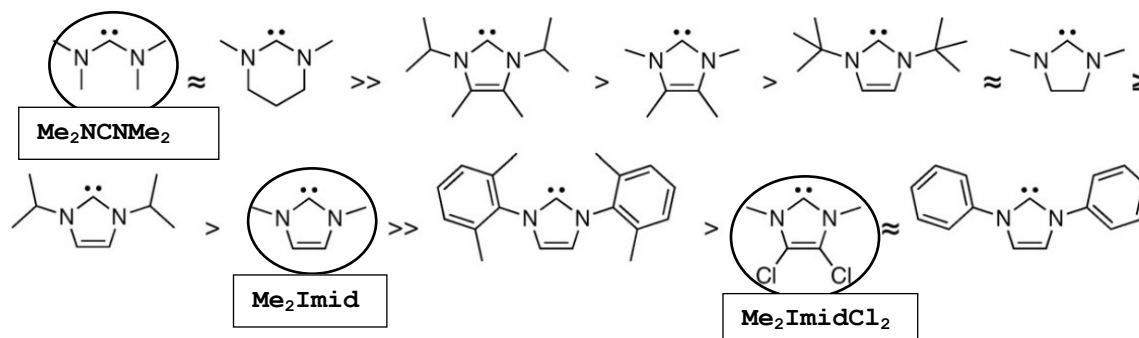

In the table below, a positive value indicates the paddlewheel structure is computed to have a lower energy than two monomers. The  $\text{Me}_2\text{ImidCl}_2$  ligand gave the largest CPW electronic stabilisation which is why some of the entries in

the table are labelled NC (not calculated). The estimation of the Gibbs free energy contributions is based on the relevant BP/SVP/D3/COSMO results. According to the computational study of Vogiatzis et al.<sup>6</sup>, post-Hartree-Fock methods like CASSCF and CASPT2 which would be expected to be quite accurate actually perform worse for the calculation of the exchange coupling parameters for copper acetate than hybrid or double-hybrid DFT-based methods. In fact, the double hybrid B2PLYP gives the best agreement and we have included this method in the results below with a larger double-polarisation def2-TZVPP basis.

| <b>Carbene</b>            | <b>Me<sub>2</sub>Imid</b> | <b>Me<sub>2</sub>NCNMe<sub>2</sub></b> | <b>Me<sub>2</sub>ImidCl<sub>2</sub></b> |
|---------------------------|---------------------------|----------------------------------------|-----------------------------------------|
| DelE: BP/SVP (kcal)       | 25.0                      | 20.4                                   | 28.0                                    |
| DelG: BP/SVP (kcal)       | 8.4                       | 3.3                                    | 10.5                                    |
| DelE: B3LYP/TZVP (kcal)   | 15.6                      | NC                                     | 15.7                                    |
| DelG: B3LYP/TZVP (kcal)   | -1.0                      | NC                                     | -1.8*                                   |
| DelE: B2PLYP/TZVPP (kcal) | NC                        | NC                                     | 15.8                                    |

\* Broken symmetry energy (BP/SVP/D3/COSMO structure)

E(High-Spin)-E(BrokenSym) = 0.0206 eV      165.890 cm<sup>-1</sup> (ANTIFERROMAGNETIC coupling)

The calculations above suggest that the CPW systems may be slightly thermodynamically unstable. This does not preclude their preparation since metastability is fundamental in chemistry. The question is whether there is a significant barrier to the dissociation of the CPW and this, in turn, depends on the pathway. One way to generate two monomers from the CPW dimer would be to increase the Cu-Cu separation. BP/SVP/D3/COSMO constrained optimisations show that lengthening the Cu-Cu distance - all other degrees of freedom are allowed to relax - from its equilibrium value of 3.015 Å in 0.1 Å steps increases the electronic energy. By 3.31 Å, the increase is 3.0 kcal mol<sup>-1</sup> and by 3.51 Å the increase is 6.8 kcal mol<sup>-1</sup> relative to the lowest energy value. This dissociation pathway is therefore not viable.
